1 **Multiplexed measurement of variant abundance and activity reveals VKOR topology,**  
2 **active site and human variant impact**

3

4 Melissa A. Chiasson<sup>1</sup>, Nathan J. Rollins<sup>2</sup>, Jason J. Stephany<sup>1</sup>, Katherine A. Sitko<sup>1</sup>, Kenneth A.  
5 Matreyek<sup>1</sup>, Marta Verby<sup>3</sup>, Song Sun<sup>3</sup>, Frederick P. Roth<sup>3</sup>, Daniel DeSloover<sup>4</sup>, Debora Marks<sup>2</sup>,  
6 Allan E. Rettie<sup>5</sup>, Douglas M. Fowler<sup>1,6\*</sup>

7

8 <sup>1</sup>Department of Genome Sciences, University of Washington, Seattle, WA, USA.

9 <sup>2</sup>Department of Systems Biology, Harvard Medical School, Boston, MA, USA.

10 <sup>3</sup>Donnelly Centre and Departments of Molecular Genetics and Computer Science, University of  
11 Toronto, and Lunenfeld-Tanenbaum Research Institute, Sinai Health System, Toronto, ON,  
12 Canada

13 <sup>4</sup>Color Genomics, Burlingame, CA, USA.

14 <sup>5</sup>Department of Medicinal Chemistry, University of Washington, Seattle, WA, USA.

15 <sup>6</sup>Department of Bioengineering, University of Washington, Seattle, WA, USA.

16

17 \* Correspondence should be addressed to D.M.F. ([dfowler@uw.edu](mailto:dfowler@uw.edu)).

18 **ABSTRACT**

19 Vitamin K epoxide reductase (VKOR) drives the vitamin K cycle, activating vitamin K-dependent  
20 blood clotting factors. VKOR is also the target of the widely used anticoagulant drug, warfarin  
21 Despite VKOR's pivotal role in coagulation, its structure and active site remain poorly understood.  
22 In addition, VKOR variants can cause vitamin K-dependent clotting factor deficiency 2 or alter  
23 warfarin response. Here, we used multiplexed, sequencing-based assays to measure the effects  
24 of 2,695 VKOR missense variants on abundance and 697 variants on activity in cultured human  
25 cells. The large-scale functional data, along with an evolutionary coupling analysis, supports a  
26 four transmembrane domain topology, with variants in transmembrane domains exhibiting  
27 strongly deleterious effects on abundance and activity. Functionally constrained regions of the  
28 protein define the active site, and we find that, of four conserved cysteines putatively critical for  
29 function, only three are absolutely required. Finally, 25% of human VKOR missense variants show  
30 reduced abundance or activity, possibly conferring warfarin sensitivity or causing disease.

## 31 INTRODUCTION

32 The enzyme vitamin K epoxide reductase (VKOR) drives the vitamin K cycle, which  
33 activates blood coagulation factors. VKOR, an endoplasmic reticulum (ER) localized  
34 transmembrane protein encoded by the gene *VKORC1*, reduces vitamin K quinone and vitamin  
35 K epoxide to vitamin K hydroquinone (Li et al., 2004; Rost et al., 2004). Vitamin K hydroquinone  
36 is required to enable gamma-glutamyl carboxylase (GGCX) to carboxylate Gla domains on  
37 vitamin K-dependent blood clotting factors. VKOR is inhibited by the anticoagulant drug warfarin  
38 (Czogalla et al., 2016; Zimmermann and Matschiner, 1974), and *VKORC1* polymorphisms  
39 contribute to an estimated ~25% of warfarin dosing variability (Owen et al., 2010). For example,  
40 variation in *VKORC1* noncoding and coding sequence can cause warfarin resistance (weekly  
41 warfarin dose > 105 mg) or warfarin sensitivity (weekly warfarin dose < ~10 mg) (Osinbowale et  
42 al., 2009; Yuan et al., 2005).

43 Though 15 million prescriptions are written for warfarin each year  
44 (<https://www.clinicalcalc.com>), fundamental questions remain regarding its target, VKOR. For  
45 example, the structure of human VKOR is unsolved, though a bacterial homolog has been  
46 crystallized (Li et al., 2010). A homology model based on bacterial VKOR has four transmembrane  
47 domains, but the quality of the homology model is unclear, as human VKOR has only 12%  
48 sequence identity to bacterial VKOR. Moreover, experimental validation of VKOR topology  
49 yielded mixed results: similar biochemical assays suggested either three- or four-  
50 transmembrane- domain topologies (Schulman et al., 2010; Tie et al., 2012; Wu et al., 2018).

51 Topology informs basic aspects of VKOR function including where vitamin K and warfarin  
52 bind, so determining the correct topology and validating the homology model is critical. In  
53 particular, VKOR has four functionally important, absolutely conserved cysteines at positions 43,  
54 51, 132, and 135, the orientation of which differs between the two proposed topologies. In the  
55 four transmembrane domain topology, all four cysteines are located on the ER luminal side of  
56 the enzyme. In this topology, cysteines 43 and 51 are hypothesized to be “loop cysteines” that

57 pass electrons from an ER-anchored reductase, possibly TMX (Schulman et al., 2010), to the  
58 active site (Rishavy et al., 2011). However, in the three transmembrane domain topology, these  
59 cysteines are located in the cytoplasm and other pathways would be required to convey electrons  
60 to the redox center. Even for non-catalytic residues, topology plays an important role. For  
61 example, vitamin K presumably binds near the redox center, and topology dictates which residues  
62 make up the substrate binding site.

63 To understand the effect of human variants and to define the vitamin K and warfarin  
64 binding sites, VKOR variant activity has been extensively studied in cell-based assays (Czogalla  
65 et al., 2016; Shen et al., 2017; Tie et al., 2013). In addition to activity, VKOR protein abundance  
66 has also been studied because abundance is an important driver of disease and warfarin  
67 response. For example, VKOR R98W is a decreased- abundance variant that, in homozygous  
68 carriers, causes vitamin K-dependent clotting factor deficiency 2 (Rost et al., 2004). A 5' UTR  
69 polymorphism reduces VKOR abundance and can be used to predict warfarin sensitivity (Gong  
70 et al., 2011). However, so far, the activity and abundance of only a handful of VKOR variants has  
71 been tested.

72 Here, we used multiplexed, sequencing-based assays (Gasperini et al., 2016) to measure  
73 the effects of 2,695 VKOR missense variants on abundance and 697 variants on activity. Our  
74 analysis of the large-scale functional data supports a four transmembrane domain topology, which  
75 an orthogonal evolutionary coupling analysis confirmed. Next, we identified distinct mutational  
76 tolerance groups, which are concordant with a four transmembrane homology model. Combining  
77 this homology model with variant abundance and activity effects, we identified an active site that  
78 contains the catalytic residues C132 and C135 and shares six positions with a previously  
79 proposed vitamin K binding site (Czogalla et al., 2016). We found that of four conserved cysteines  
80 putatively critical for function, only three are absolutely required, and analyzed the mutational  
81 signatures of two putative ER retention motifs. Human *VKORC1* variants present in genetic  
82 databases and contributed by a commercial genetic testing laboratory were each classified based

83 on abundance and activity. While most variants show wild type-like activity, 25% show low  
84 abundance or activity, which could confer warfarin sensitivity or cause disease in a homozygous  
85 context. Finally, we analyzed warfarin resistance variants and found that they span a range of  
86 abundances, indicating that increased abundance is an uncommon mechanism of warfarin  
87 resistance.

88

## 89 **RESULTS**

### 90 **Multiplexed measurement of VKOR variant abundance using VAMP-seq**

91 To measure the abundance of VKOR variants, we applied Variant Abundance by  
92 Massively Parallel sequencing (VAMP-seq), an assay we recently developed (Matreyek et al.,  
93 2018). In VAMP-seq, a protein variant is fused to eGFP with a short amino acid linker. If the  
94 variant is stable and properly folded, then the eGFP fusion will not be degraded, and cells will  
95 have high eGFP fluorescence. In contrast, if the variant causes the protein to misfold, protein  
96 quality control machinery will detect and degrade the eGFP fusion, leading to a decrease in eGFP  
97 signal (Fig. 1a). mCherry is also expressed from an internal ribosomal entry site (IRES) to control  
98 for expression. Differences in abundance are measured on a flow cytometer using the ratio of  
99 eGFP to mCherry signal. To determine whether VAMP-seq could be applied to VKOR, we fused  
100 eGFP to VKOR N- or C-terminally and found that both orientations had high eGFP signal (Figure  
101 1—figure supplement 1). We compared N-terminally tagged wild type (WT) VKOR to R98W, a  
102 variant that ablates a putative ER retention motif and reduces abundance (Czogalla et al., 2014),  
103 and to TMD1 $\Delta$ , a deletion of residues 10-30 which comprise the putative first transmembrane  
104 domain (TMD1; Fig. 1b). Both reduced- abundance variants exhibited much lower eGFP:mCherry  
105 ratios than WT, demonstrating that VAMP-seq could be applied to VKOR.

106 We constructed a barcoded site-saturation mutagenesis VKOR library that covered 92.5%  
107 of all 3,240 possible missense variants. To express this library in HEK293T cells we used a Bxb1  
108 recombinase landing pad system we previously developed (Matreyek et al., 2017). In this system,

109 each cell expresses a single VKOR variant. Recombined, VKOR variant-expressing cells were  
110 then sorted into quartile bins based on their eGFP:mCherry ratios. Each bin was deeply  
111 sequenced, and abundance scores were calculated based on each variant's distribution across  
112 bins. Raw abundance scores were normalized such that WT-like variants had a score of one and  
113 total loss of abundance variants had a score of zero (Fig. 1c). We performed seven replicates,  
114 which were well correlated (Figure 1—figure supplement 2, mean Pearson's  $r = 0.73$ ; mean  
115 Spearman's  $\rho = 0.7$ , Supplementary Table 1). Abundance score means and confidence intervals  
116 for each variant were calculated from the replicates.

117 The final dataset describes the effect of 2,695 of the 3,240 possible missense VKOR  
118 variants on abundance (Fig. 1d and 1e). Validation of 10 randomly selected variants spanning the  
119 abundance score range showed high concordance between individual eGFP:mCherry ratios  
120 assessed by flow cytometry and VAMP-seq derived abundance scores (Fig. 1f, Pearson's  $r =$   
121  $0.96$ , Spearman's  $\rho = 0.97$ ).

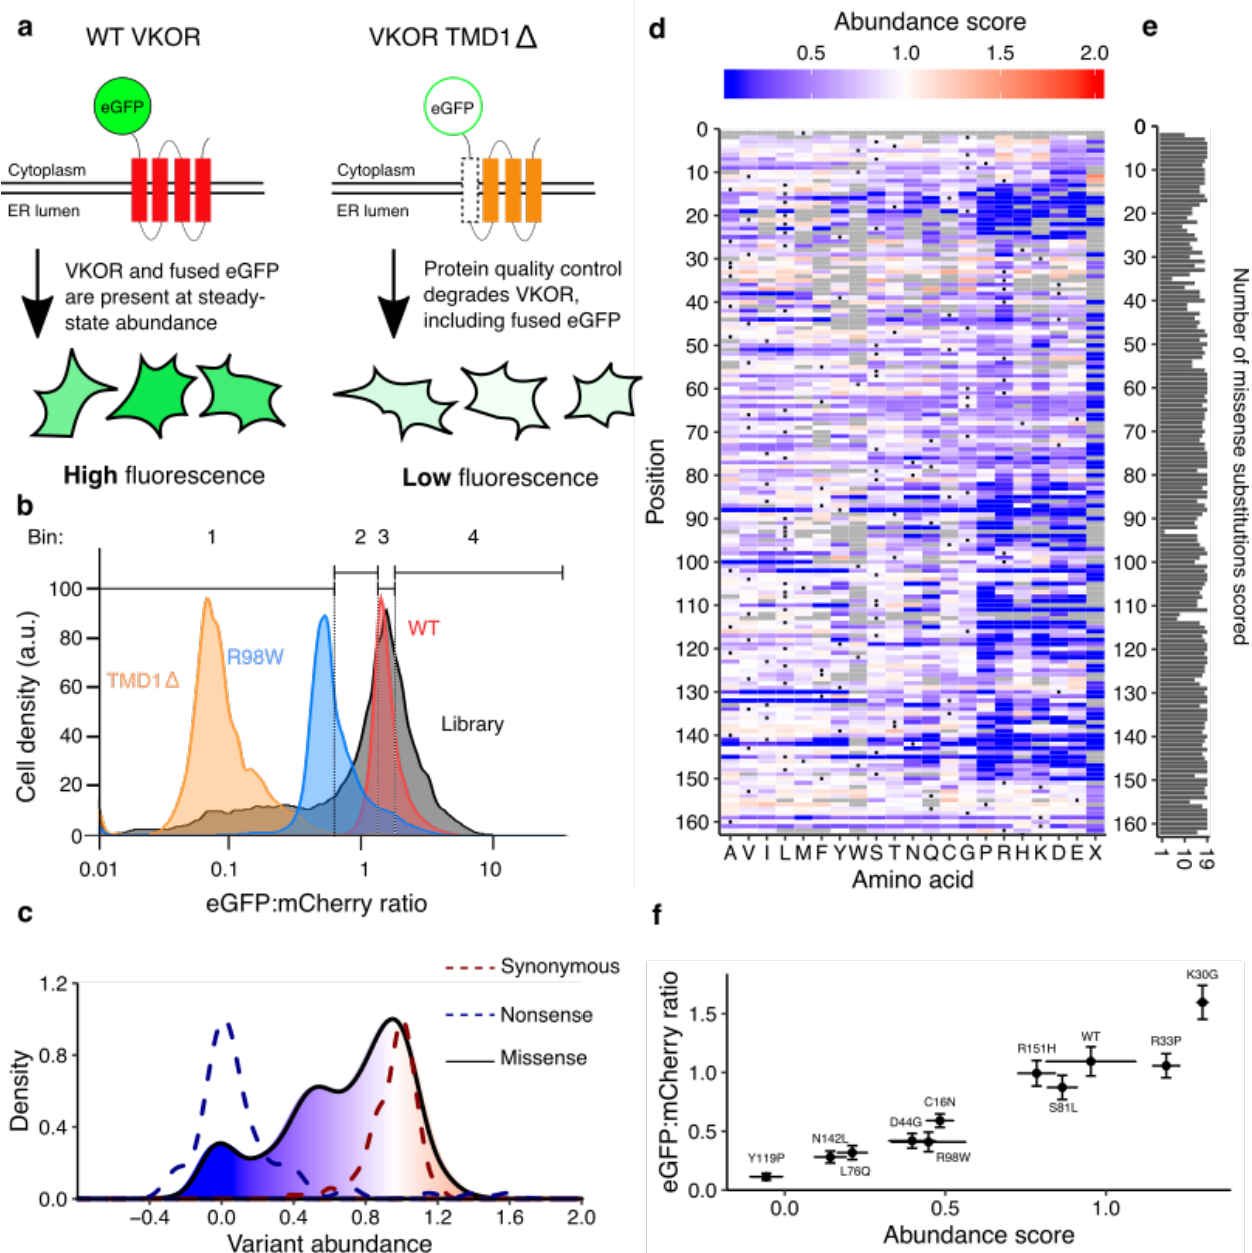

122

123 **Figure 1. Multiplexed measurement of VKOR variant abundance using VAMP-seq.** a, To  
 124 measure abundance, an eGFP reporter is fused to VKOR. eGFP-tagged WT VKOR is folded  
 125 correctly, leading to high eGFP fluorescence. However, a destabilized variant is degraded by  
 126 protein quality control machinery, leading to low eGFP fluorescence. b, Flow cytometry is used to  
 127 bin cells based on their eGFP:mCherry fluorescence intensity. Density plots of VKOR library  
 128 expressing cells (grey, n = 12,109) relative to three controls: WT VKOR (red, n = 4,756), VKOR

129 98W (blue, n = 2,453) , and VKOR TMD1 $\Delta$  (orange, n = 2,204) are shown. Quartile bins for FACS  
130 of the library are marked. **c**, Abundance score density plots of nonsense variants (dashed blue  
131 line, n = 88), synonymous variants (dashed red line, n = 127), and missense variants (filled, solid  
132 line, n = 2,695). The missense variant density is colored as a gradient between the lowest 10%  
133 of abundance scores (blue), the WT abundance score (white) and abundance scores above WT  
134 (red). **d**, Heatmap showing abundance scores for each substitution at every position within VKOR.  
135 Heatmap color indicates abundance scores scaled as a gradient between the lowest 10% of  
136 abundance scores (blue), the WT abundance score (white), and abundance scores above WT  
137 (red). Grey bars indicate missing variants. Black dots indicate WT amino acids. **e**, Number of  
138 substitutions scored at each position for abundance. **f**, Scatterplot comparing VAMP-seq derived  
139 abundance scores to mean eGFP:mCherry (n = 1 replicate) ratios measured individually by flow  
140 cytometry. Variants were selected at random to span the abundance score range.

141 **Figure 1-source data 1.** VKOR variant abundance and activity scores.

142 **Figure 1-source data 2.** Flow cytometry for monoclonal validation of variants. 11 variants were  
143 run individually, values show mean and error for VAMP-seq score and eGFP:mcherry intensity.



144 **Multiplexed measurement of VKOR variant activity using a gamma-glutamyl**  
145 **carboxylation reporter**

146 We also measured VKOR variant activity, adapting a HEK293 cell assay based on vitamin  
147 K- dependent gamma-glutamyl carboxylation of a cell-surface reporter protein (Haque et al.,  
148 2014). In this assay, if VKOR is active, a Factor IX domain reporter is carboxylated, secreted and  
149 retained on the cell surface where it is detected with a carboxylation-specific, fluorophore-labeled  
150 antibody. However, if VKOR is inactive, the reporter is not carboxylated and the antibody cannot  
151 bind (Fig. 2a). We modified the HEK293 activity reporter cell line to eliminate endogenous VKOR  
152 activity by knocking out both *VKORC1* and its paralog, *VKORC1-like 1* (*VKORC1L1*) (Tie et al.,  
153 2013) (Figure 2—figure supplement 1). We also installed a Bxb1 landing pad to facilitate  
154 expression of individual VKOR variants or libraries (Figure 2—figure supplement 1).  
155 Recombination of WT *VKORC1* into the landing pad of the HEK293 VKOR activity reporter cell  
156 line yielded robust reporter activation, demonstrating that the reporter line could be used to assess  
157 the activity of a library of VKOR variants (Fig. 2b).

158 We recombined a library of *VKORC1* variants into the HEK293 activity reporter cell line,  
159 and sorted recombinant cells into quartile bins based on carboxylation-specific antibody binding.  
160 Each bin was deeply sequenced and, as for VAMP-seq, an activity score was computed for each  
161 variant. Final activity scores and confidence intervals were computed from six replicates for a total  
162 of 697 missense variants, 21.5% of those possible (Figure 2—figure supplement 2, mean  
163 Pearson's  $r = 0.62$  and mean Spearman's  $\rho = 0.56$ , Supplementary Table 2). Our activity score  
164 density plot showed that most variants had WT-like activity scores (Fig. 2c).

165

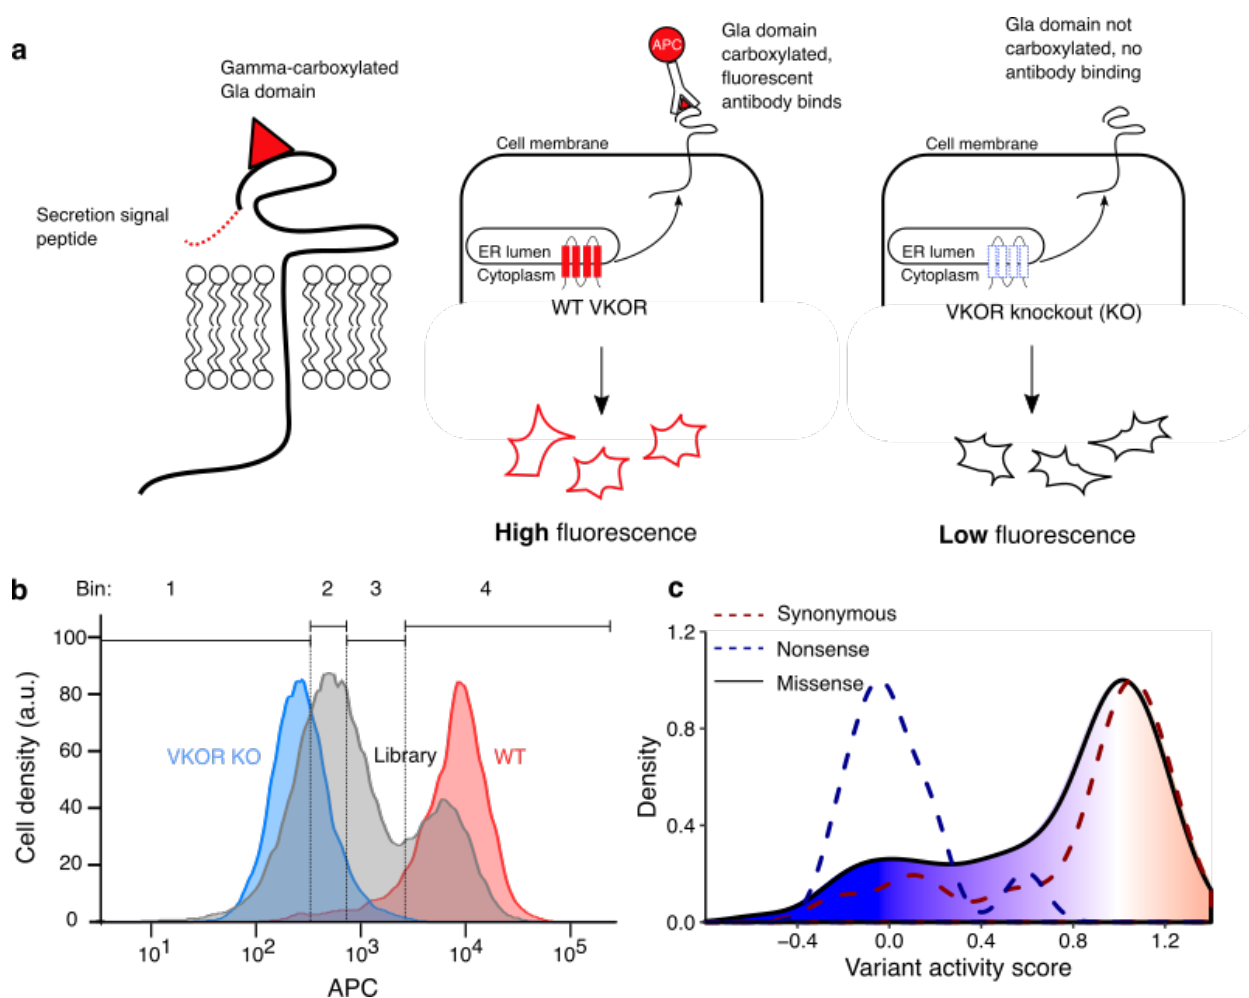

166

167 **Figure 2. Multiplexed measurement of VKOR variant activity using a gamma-**

168 **glutamyl carboxylation reporter. a, left panel, a Factor IX Gla domain reporter is expressed**

169 **in HEK293 cells and consists of a prothrombin pre-pro-peptide which allows for processing and**

170 **secretion, a Factor IX Gla domain, and Proline rich Gla protein 2 (PRGP2) transmembrane and**

171 **cytoplasmic domains. middle panel, Cells expressing WT VKOR carboxylate the reporter Gla**

172 **domain, which, upon trafficking to the cell surface, can be stained using a carboxylation-specific**

173 **antibody conjugated to the fluorophore APC. VKOR knockout cells do not carboxylate the**

174 **reporter, so the fluorescent antibody does not bind. b, Density plots of HEK293 activity reporter**

175 **cells stained with APC-labeled carboxylation-specific antibody expressing no VKOR (blue, n =**

176 **7,188), WT VKOR (red, n = 4,107), or the VKOR variant library (grey, n = 41,418). Quartile bins**

177 for FACS of the library are marked. **c**, Activity score density plots of nonsense variants (dashed  
178 blue line, n = 14), synonymous variants (dashed red line, n = 35), and missense variants (filled,  
179 solid line, n = 697). The missense variant density is colored as a gradient between the lowest  
180 10% of activity scores (blue), the WT activity score (white) and activity scores above WT (red).

## 181 **Human VKOR has four transmembrane domains**

182 Two different domain models, one with three transmembrane domains and another with  
183 four, have been proposed for human VKOR (Li et al., 2010; Tie et al., 2012) (Fig. 3a). Because  
184 charged amino acids occur infrequently in transmembrane domains and should be less tolerated,  
185 we reasoned we could discriminate between these two models using a sliding window average of  
186 the effect of charged substitutions on VKOR abundance (A. Elazar et al., 2016; Sharpe et al.,  
187 2010). We found four clearly demarcated regions where charged substitutions profoundly reduced  
188 VKOR abundance, relative to aliphatic substitutions (Fig. 3b). To exclude the possibility that the  
189 eGFP tag used in our VAMP-seq assay somehow affected topology, we also analyzed the activity  
190 score data. The activity data, derived using native, untagged VKOR, revealed the same four  
191 minima as the abundance data (Fig. 3c). In addition to these four minima, we also observed an  
192 activity score minimum at position 57, corresponding to a conserved serine at this position. This  
193 serine occurs at the end of the luminal half-helix hypothesized to shield the active site from non-  
194 specific oxidation, so it is likely this signal is the result of disruption of that half helix. Together,  
195 these results strongly support the hypothesis that, like its distant bacterial homolog, human VKOR  
196 has four transmembrane domains.

197 To validate these findings, we performed evolutionary coupling analysis to infer the three-  
198 dimensional structure suggested by co-evolution. We aligned 2,770 VKOR sequences from both  
199 eukaryotes and prokaryotes and identified coupled residues using the EVcouplings software  
200 (Hopf et al., 2012; Marks et al., 2011). Local patterns of evolutionary couplings (i.e. between  
201 nearby positions,  $i$  to  $i+4$ ) supported a four-helix topology. The helices predicted by these local  
202 evolutionary couplings overlapped 70 of the 82 residues in alpha-helices of the bacterial structure  
203 (PDB 4NV5) (Shen et al., 2017) and included in our alignment, non-gapped in >70% of aligned  
204 VKOR sequences (hyper-geometric test  $p$ -value =  $3.26^{-23}$ , Fig. 3d).

205 We identified non-local evolutionary coupling patterns characteristic of three-dimensional  
206 contacts, which also strongly supported the four transmembrane domain model. Using these

207 contacts, we computationally folded human VKOR, yielding a modeled structure similar to the  
208 bacterial structure (RMSD = 2.58 Å over 97/143 C<sub>alpha</sub>, Figure 3—figure supplement 1). The  
209 predicted tertiary structure has a four-helix topology, with antiparallel contacts between  
210 transmembrane domains 1 and 2 (Fig. 3e, Fig. 3f) and between transmembrane domains 1 and  
211 4 (Fig. 3e, Fig. 3g), which are only possible in a four-helix topology.

212 Comparison of our abundance data to the energy required to insert different amino acids  
213 into the membrane yields additional evidence for the four transmembrane domain model. The  
214 apparent change in free energy ( $\Delta\Delta G_{app}$ ) of insertion relative to wild type for every amino acid has  
215 been determined experimentally using deep mutational scanning of bacterial membrane proteins  
216 (A. A. Elazar et al., 2016). Median abundance score and  $\Delta\Delta G_{app}$  for each amino acid are  
217 correlated (Fig. 3h). In particular, the large energetic cost of insertion of transmembrane domains  
218 with charged amino acids is apparent, including within the second transmembrane domain TMD2.  
219 Beyond insertion energies of individual amino acids, the overall hydrophobicity of transmembrane  
220 helices contributes to membrane protein insertion (A. A. Elazar et al., 2016), as well as topology  
221 (A. Elazar et al., 2016) and degradation (Guerriero et al., 2017). To determine whether overall  
222 helix hydrophobicity was a large factor contributing to abundance scores, we calculated the free  
223 energy for insertion ( $\Delta G_{helix}$ ) of each helix in the four transmembrane domain model using the  $\Delta G$   
224 prediction server v1.0 (Hessa et al., 2007). The four helices of VKOR have different  $\Delta G_{helix}$ , with  
225 only transmembrane domain 3 having favorable  $\Delta G_{helix}$  for insertion (TMD1: 0.435, TMD2: 1.551,  
226 TMD3: -1.749, and TMD4: 1.734). Interestingly, we observed that TMD3 has a high density of  
227 substitutions with WT-like scores (Figure 3—figure supplement 2), suggesting that TMD3's  
228 favorable insertion energy might explain its mutational tolerance.

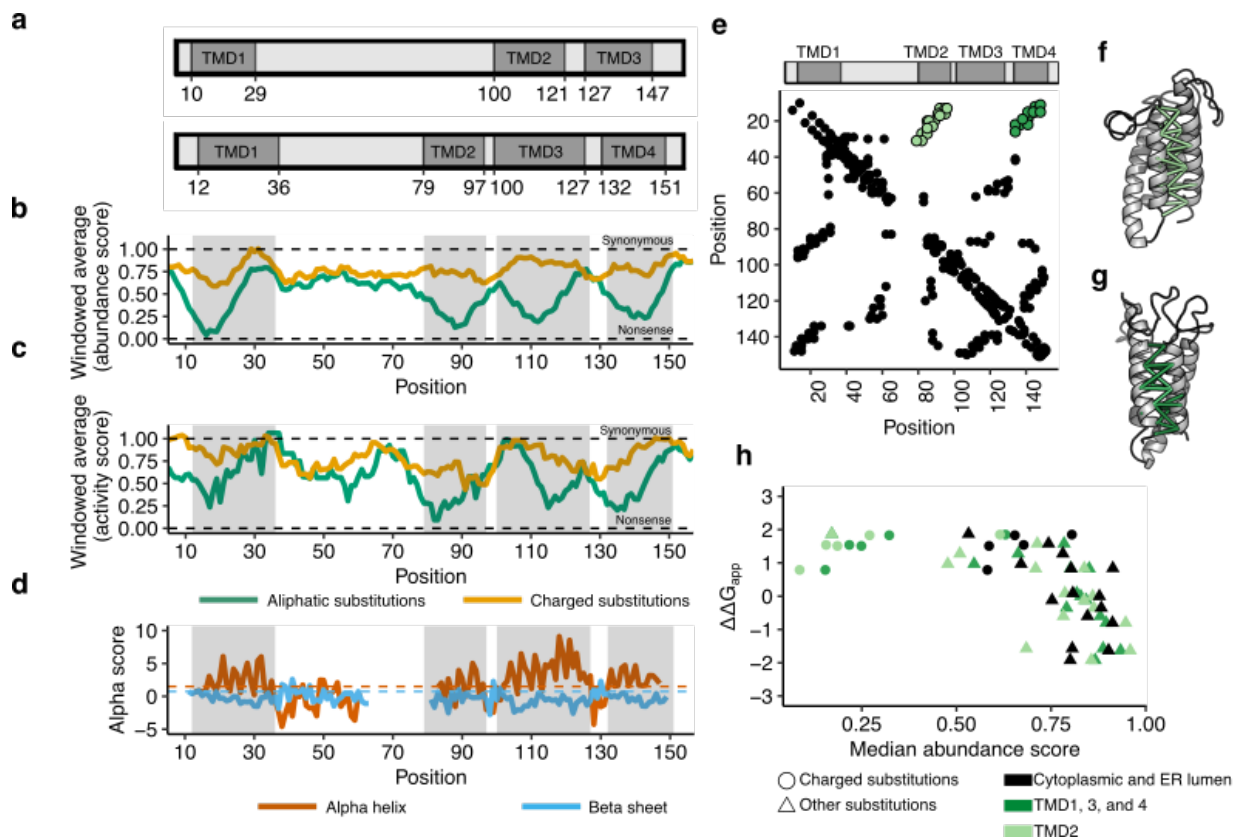

229  
 230 **Figure 3. Abundance, activity, and evolutionary data support four transmembrane**  
 231 **domains.** **a**, Three and four transmembrane domain (TMD) models of VKOR, with TMDs in dark  
 232 grey (Li et al., 2010; Tie et al., 2012). **b**, Windowed abundance score means (width = 10 positions)  
 233 for charged substitutions (green) and aliphatic substitutions (gold). Dark grey boxes correspond  
 234 to TMDs proposed in the four domain model. Dashed lines show median synonymous and the  
 235 nonsense abundance scores. **c**, Windowed activity score means (width = 10 positions) for  
 236 charged substitutions (green) and aliphatic substitutions (gold). Boxes and dashed lines as  
 237 described in **b**. **d**, Secondary structure classification from local evolutionary couplings shown as  
 238 alpha scores calculated for alpha helices (red) and beta sheets (blue). Dashed lines show  
 239 significance cut-offs for alpha helices (1.5, red) and beta sheets (0.75, blue) (Toth-Petroczy et al.,  
 240 2016). **e**, A contact map derived from evolutionary couplings. Black points show pairs of positions  
 241 with significant coupling. Light green points show predicted contacts between TMD1 and TMD2.  
 242 Dark green points show predicted contacts between TMD1 and TMD4. **f**, Predicted tertiary

243 contacts between TMD1-TMD2 (shown in light green in **e**) and **g**, TMD1-TMD4 (shown in dark  
244 green in **e**) shown on the evolutionary couplings-derived hVKOR structural model. **h**, Scatterplot  
245 comparing change in free energy for membrane insertion (A. A. Elazar et al., 2016) ( $\Delta\Delta G_{app}$ ) to  
246 median abundance score for each amino acid substitution. Cytoplasmic and luminal positions  
247 shown in black, TMD2 in light green, and TMDs 1, 3, and 4 in dark green. Charged substitutions  
248 shown as circles, all other substitutions as triangles.

249 **Figure 3-source data 1.** Evolutionary couplings secondary structure predictions. Rows show  
250 position, with columns showing alpha helix or beta sheet values and predictions.

251 **Figure 3-source data 2.** Evolutionary couplings 3D contact predictions. Rows show pairs of  
252 residues with contact probabilities.

253 **Figure 3-source data 3.** Insertion energies from Elazar et al., 2016. Amino acids with  
254 calculated insertion energy.

## 255 **Detailed structural context of VKOR variant abundance effects**

256           Having confirmed that human VKOR has four transmembrane domains, we next explored  
257 the detailed pattern of mutational effects we observed in the context of a four transmembrane  
258 domain homology model. We generated a homology model of human VKOR with I-TASSER using  
259 the bacterial VKOR structure (Shen et al., 2017; Yang et al., 2015). We performed hierarchical  
260 clustering of positions based on abundance scores, which yielded four groups of positions with  
261 characteristic mutational patterns (Fig. 4a). In Group 1, most substitutions were neutral or  
262 increased abundance; in Group 2, charged amino acid and proline substitutions decreased  
263 abundance; in Group 3, all substitutions decreased abundance; and in Group 4, all substitutions  
264 decreased abundance profoundly. Each group corresponded to a spatially distinct region of the  
265 homology model structure (Fig. 4b).

266           Group 1 positions were located in or adjacent to cytoplasmic and ER lumenal loops, which  
267 were more tolerant of substitutions than the transmembrane domains. At four Group 1 positions,  
268 K30, R33, R35, and R37, almost every substitution increased abundance. These positively  
269 charged positions are positioned either at the edge of TMD1 (K30) or in the ER lumen directly  
270 abutting the top of TMD1 (R33, R35, and R37). The “positive inside rule” (von Heijne, 1989),  
271 suggests that positive charges in membrane proteins generally reside in the cytoplasm, and this  
272 phenomenon is important for driving topology and membrane insertion (A. Elazar et al., 2016;  
273 Nilsson and von Heijne, 1990; von Heijne, 1989). K30, R33, R35, and R37 violate the positive  
274 inside rule, and substitutions at these positions may increase abundance by reducing charge  
275 inside the ER, reducing topological frustration or increasing membrane insertion efficiency.  
276 Compared to the other 12 arginine and lysine positions in WT VKOR, K30, R33, R35, and R37  
277 are the only ones where substitutions generally increased abundance (Figure 4—figure  
278 supplement 1). Our observations are consistent with a screen of rat VKOR variants intended to  
279 improve protein expression in *E. coli* where deletion of positions 31 to 33 increased protein levels  
280 (Hatahet et al., 2015).



281 In Group 2, charged amino acids or proline substitutions generally decreased abundance.  
282 Group 2 consisted mostly of transmembrane positions that had side chains projecting into the  
283 lipid bilayer. Such transmembrane positions usually have hydrophobic, nonpolar side chains  
284 (Ulmschneider and Sansom, 2001). Proline has poor helix forming propensity, explaining why  
285 proline substitutions decreased abundance at these positions. Group 3 consisted of a mixture of  
286 cytoplasmic, ER lumenal and transmembrane positions where most substitutions decreased  
287 abundance. The cytoplasmic positions in this group included the putative dilysine ER localization  
288 motif at positions 159 and 161. Also in this group were R98, part of another putative ER retention  
289 motif at positions 98 and 100, and a glycine adjacent to TMD1 at position nine. The  
290 transmembrane positions had side chains projecting towards neighboring transmembrane  
291 helices, suggesting that, as for other membrane proteins (Fleming and Engelman, 2001; Mravic  
292 et al., 2019), intramolecular sidechain packing is important for abundance.

293 Finally, substitutions in Group 4, consisting of positions G19, Y88, I141, and L145, resulted  
294 in catastrophic loss of abundance. These positions are all in transmembrane domains with side  
295 chains projecting into the interior of the protein. On the basis of strict mutational intolerance of  
296 these positions, we hypothesized that their coordinated side chain packing comprises the core of  
297 the VKOR four helix bundle. Indeed, Group 4 residues had dramatically lower relative solvent  
298 accessibility than Groups 1-3 (Fig. 4c).

299 The four transmembrane domain homology models also allowed us to explain VKOR's  
300 unusual trimodal distribution of variant abundance scores. Previous VAMP-seq derived  
301 abundance score distributions for the cytosolic proteins TPMT and PTEN were bimodal (Figure  
302 4—figure supplement 2) (Matreyek et al., 2018), and 15 of 16 deep mutational scans of other  
303 soluble proteins using a variety of other assays also exhibited bimodal functional score  
304 distributions (Gray et al., 2017). Because VKOR is an ER resident, transmembrane protein, we  
305 hypothesized that its unusual trimodal abundance score distribution resulted from transmembrane  
306 domain substitutions. Indeed, the lowest mode of the distribution was composed almost

307 exclusively of deleterious transmembrane domain substitutions (Fig. 4d). In contrast, the  
308 intermediate mode consisted of substitutions in the ER lumen, cytoplasm, and transmembrane  
309 domains. Similarly, substitutions that profoundly decreased activity occurred in transmembrane  
310 domains (Fig. 4e).

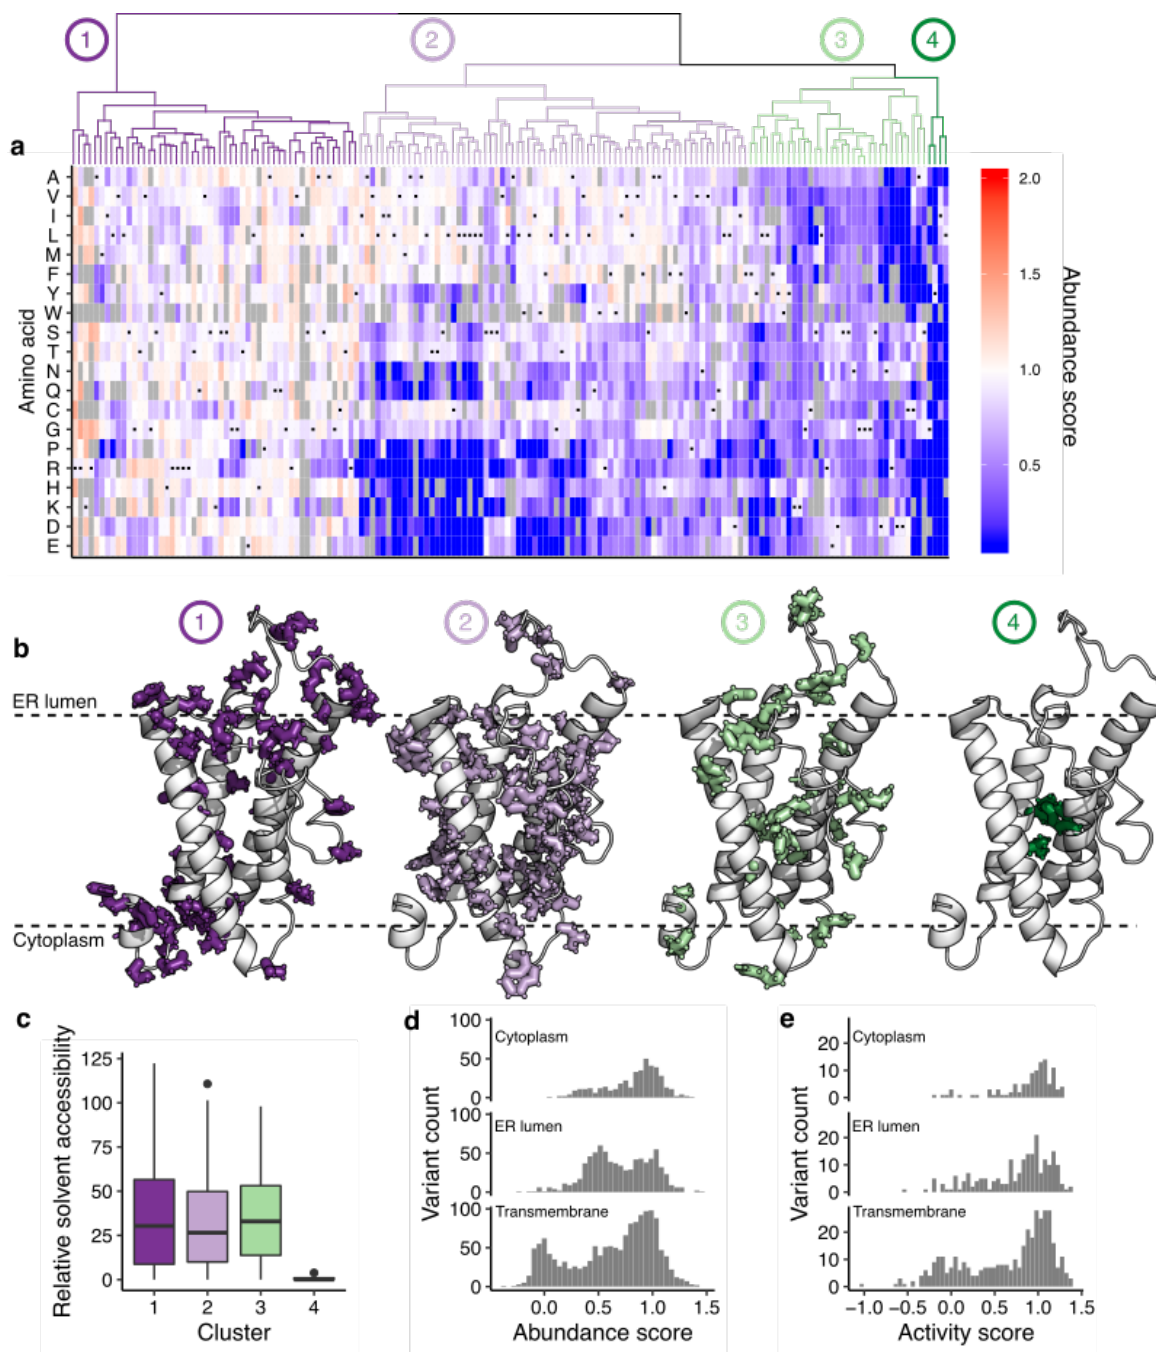

311  
312 **Figure 4. Hierarchical clustering of abundance scores and distributions of abundance and**  
313 **activity scores by domain. a,** A heatmap showing hierarchical clustering of positions based on  
314 abundance score vectors, with the dendrogram above. Groups of positions, chosen based on the  
315 dendrogram, are numbered and colored. Heatmap color indicates abundance scores scaled as a  
316 gradient between the lowest 10% of abundance scores (blue), the WT abundance score (white)

317 and abundance scores above WT (red). Grey bars indicate missing variants. Black dots indicate  
318 WT amino acids. **b**, Positions in groups 1-4 shown on the VKOR homology model, with numbers  
319 and colors corresponding to panel **a**. **c**, Boxplot showing relative solvent accessibility of positions  
320 in each cluster determined using DSSP (Kabsch and Sander, 1983; Touw et al., 2015) and  
321 colored as in **b**. Bold black line shows median, box shows 25th and 75th percentile. Line shows  
322 1.5 interquartile range above and below percentiles, and outliers are shown as black points. **d**,  
323 Histograms of abundance scores for missense variants in the cytoplasmic, ER luminal, or  
324 transmembrane domains. **e**, Histograms of activity scores for missense variants in the  
325 cytoplasmic, ER luminal, or transmembrane domains.

## 326 **Variant activity and abundance identify functionally constrained regions of VKOR**

327 We reasoned that our activity and abundance data could reveal the location of functionally  
328 important positions in VKOR, including the active site, since functionally important positions  
329 should have many loss-of-activity but few loss-of-abundance variants. Thus, we calculated the  
330 specific activity for each variant by taking the ratio of its rescaled activity score and abundance  
331 scores (see Methods) ratio. We computed the median specific activity for each position;  
332 substitutions at positions with low median specific activity generally have low activity relative to  
333 their abundance. We set a specific activity threshold based on two absolutely conserved cysteines  
334 that form VKOR's redox center, C132 and C135. Using this threshold, positions with the lowest  
335 12.5% of specific activity scores and with at least four variants scored for activity were deemed  
336 functionally constrained and mapped on the homology model of VKOR (Fig. 5a, Figure 5—figure  
337 supplement 1). These 11 functionally constrained positions are organized around C132 and C135  
338 and define, at least in part, the VKOR active site (Fig. 5b,c, Figure 5—figure supplements 1).  
339 Among the functionally constrained positions are six positions previously identified in vitamin K  
340 docking simulations (Czogalla et al., 2016) (Figure 5—figure supplement 1), including F55, which  
341 is hypothesized to bind vitamin K. Three functionally constrained positions, G60, R61, and A121,  
342 did not match any position in the active site predicted by docking, but were immediate neighbors  
343 of W59 and L120, positions that were.

344 Besides C132 and C135, VKOR has two additional absolutely conserved cysteines, C43  
345 and C51. In the four transmembrane domain model, C43 and C51 are postulated to be loop  
346 cysteines that relay electrons to the C132/C135 redox center (Liu et al., 2014). We classified C43  
347 as having low specific activity, but we only observed one variant at this position, so it was not  
348 included in our set of functionally constrained positions (Figure 5—figure supplement 2). In  
349 contrast, substitutions at C51 resulted in only modest activity loss, a phenomenon that has been  
350 observed previously (Shen et al., 2017). Interestingly, every substitution at C51 and 15 of 19 at  
351 C132 decreased VKOR abundance (Figure 5—figure supplement 2). Inside cells, the majority of

352 VKOR molecules have a C51-C132 disulfide bond, and warfarin binds to this redox state of VKOR  
353 (Shen et al., 2017). Since disruption of this disulfide bond apparently impacts abundance as well  
354 as activity, this bond may be important for VKOR folding and stability.

355 VKOR is thought to contain two sequences important for ER localization. The first is a  
356 diarginine motif (RxR) at positions 98-100, and the second is a dilysine motif (KXKXX) at positions  
357 159-163. While we did not directly measure localization, we found that only six of 19 R98 variants  
358 and seven of 14 R100 variants resulted in low abundance (Figure 5—figure supplement 3). In  
359 contrast, nearly all variants at K159 (14 of 18) and K161 (17 of 19) resulted in low abundance  
360 (Figure 5—figure supplement 3). A histidine substitution was tolerated at position 161, which  
361 mimics the KXHXX motif commonly found in coronaviruses and a small number of human proteins  
362 (Ma and Goldberg, 2013). Because protein localization and degradation are coupled (Hessa et  
363 al., 2011), we suggest that the reductions in abundance we observe are the result of degradation  
364 caused by mislocalization, and that the dilysine motif at positions 159-163 is essential for VKOR  
365 ER localization. Overall, comparison of VKOR variant activity and abundance revealed  
366 functionally important regions, refining our understanding of the active site, redox-active  
367 cysteines, and ER retention motifs.

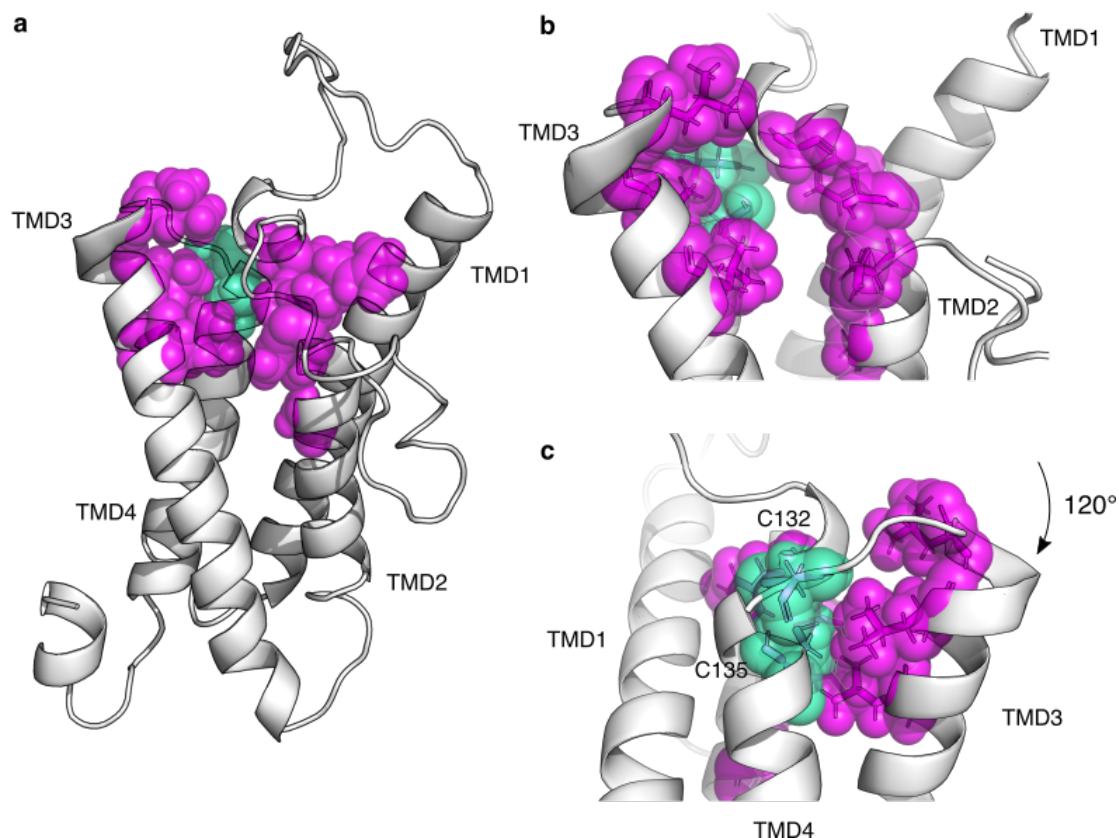

368

369 **Figure 5. Functionally constrained positions reveal VKOR active site and critical cysteines.**

370 **a**, Positions with the lowest 12.5% of median specific activity scores and at least four variants  
371 scored for activity are shown as magenta spheres on the VKOR homology model. Cysteines  
372 C132, and C135, also in the bottom 12.5% of median specific activity scores, are shown in green  
373 spheres. **b**, Magnified view of the redox center cysteines (positions 132, and 135, green spheres)  
374 and surrounding residues that define the active site (magenta spheres). Residues shown in  
375 transparent spheres, with side chains also shown in sticks. **c**, panel **b** rotated 120°C.

376 **Figure 5-source data 1.** VKOR positional abundance and activity scores. Rows show positions,  
377 with columns showing median abundance score, median activity score, rescaled scores, and  
378 specific activity score.



## 379 **Functional consequences of VKOR variants observed in humans**

380 Variation in VKOR is linked to both disease and warfarin response, but the overwhelming  
381 majority of VKOR variants found in humans so far have unknown effects. Thus, we curated a total  
382 of 215 variants that had either been previously reported in the literature as affecting warfarin  
383 response (Supplementary Table 3), were in ClinVar (Landrum et al., 2014), were in gnomAD v2  
384 or v3 (Karczewski et al., 2019), or were present in individuals whose healthcare provider had  
385 ordered a multi-gene panel test from a commercial testing laboratory (Color Genomics)  
386 (Supplementary Table 4). Of eight variants present in ClinVar, we included only one (D36Y) in  
387 our analysis as it was the only variant reviewed by an expert panel (Kurnik et al., 2012). 159  
388 variants were present in gnomAD, and all but one missense variant (D36Y) had population  
389 frequencies less than 0.2%. 28 were literature-curated warfarin response variants, only 12  
390 variants of which were in one of the databases surveyed. D36Y was the only warfarin response  
391 variant present in all databases, ClinVar, gnomAD, and Color (Figure 6—figure supplement 1).

392 We classified 193 of the 215 variants we curated according to their abundance  
393 (Supplementary Table 4). All synonymous variants with the exception of two were WT-like or  
394 possibly WT-like, while the three nonsense variants scored had as having low abundance (Fig.  
395 6a). Missense variants spanned all abundance categories, with 129 (60%) having WT-like or  
396 possibly WT-like abundance. 30 missense variants were low abundance, and 12 were high  
397 abundance. The single known pathogenic variant R98W was low abundance (Fig. 6b). We also  
398 classified 54 variants according to their activity (Supplementary Table 4). Only one variant,  
399 A115V, exhibited low activity. It had WT-like abundance, indicating that the loss of activity is not  
400 due to loss of abundance.

401 We examined warfarin response variants including W5X, the only variant observed so far  
402 linked to human warfarin sensitivity (Oldenburg et al., 2004). As expected, W5X was low  
403 abundance, reinforcing that heterozygous loss of VKOR is the cause of warfarin sensitivity in  
404 carriers of this variant. Warfarin resistance variants, on the other hand, are predicted to abrogate



405 warfarin binding (Li et al., 2010), but it is unclear whether these variants have appreciable effects  
406 on abundance or activity. We found that warfarin resistance variants span a range of abundances  
407 and that the distribution of warfarin resistant variant abundance was not different from missense  
408 variants generally (Fig. 6c, two-sided Kolmogorov-Smirnov test  $p= 0.438$ ). Five warfarin-  
409 resistance variants had low abundance, suggesting that these variants must block drug binding  
410 or increase activity to confer resistance. One variant, A26T, had high abundance, a possible  
411 mechanism of warfarin resistance. The five warfarin resistance variants, R58G, W59L, V66M,  
412 G71A, and N77S, whose activity we scored, were all WT-like. Thus, our abundance and activity  
413 data are consistent with warfarin resistance arising largely from variants that block warfarin  
414 binding.

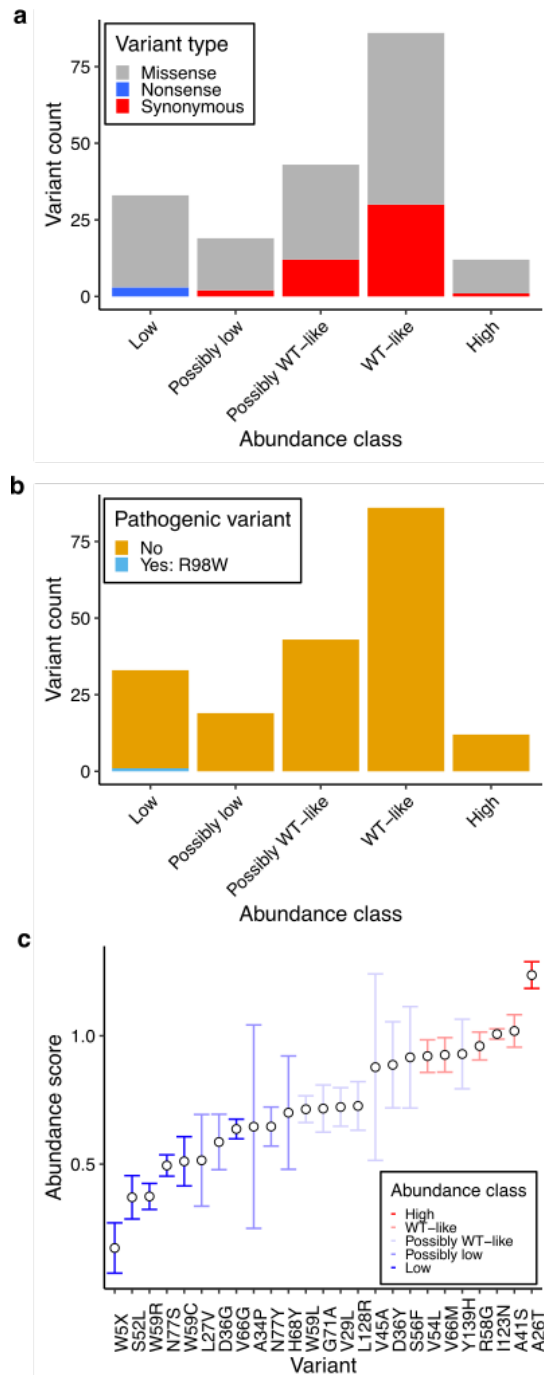

415

416 **Figure 6. Characterization of human variants using abundance and activity data. a,**

417 Histogram of abundance classifications for variants from gnomAD, ClinVar, and Color Genomics.

418 Nonsense variants colored in blue, synonymous in red, and missense in grey. **b,** Histogram of

419 abundance classifications for same variants in **a**, colored by pathogenicity. The only variant known

420 to cause disease, R98W, is colored in blue. All other variants shown in yellow. **c,** Scatterplot

421 showing abundance scores for literature-curated warfarin resistance variants. Bars show  
422 standard error and are colored by abundance class. Variants are arranged in order of abundance  
423 score.

## 424 **DISCUSSION**

425 We conducted multiplexed assays to measure the effects of 2,695 VKOR variants on  
426 abundance and 697 variants on activity. Both abundance and activity data provided evidence for  
427 a four transmembrane topology, which was further supported by evolutionary couplings analysis.  
428 We evaluated a VKOR homology model in the context of the patterns of variant effects on  
429 abundance we measured, and found that the homology model could explain these patterns. Low  
430 specific activity residues mapped onto this homology model identify, at least in part, the active  
431 site, which largely overlaps with the results of a vitamin K docking simulation (Czogalla et al.,  
432 2016). Our active site is shallower than what the docking simulation predicts; this is the result of  
433 low abundance scores at some of the deeper, transmembrane positions predicted by docking to  
434 bind the isoprenoid chain of vitamin K (F87, Y88), and poor coverage of activity scores for other  
435 positions (V112, S113). In light of the fact that substitutions at F87 and Y88 resulted in low  
436 abundance, we note that the modeled vitamin K binding mode would disrupt packing of VKOR  
437 core residues and require repacking of helices to maintain protein stability (Merkle et al., 2018).  
438 In addition to the active site, substitutions at the dilysine and, to a lesser extent, the diarginine ER  
439 localization motifs caused abundance loss.

440 We also used our large-scale functional data to analyze 215 VKOR variants found in  
441 humans. 16% of these variants affect neither activity nor abundance; we identified 54 previously  
442 uncharacterized low abundance or low activity variants that could be pathogenic or alter warfarin  
443 response. We found that only one warfarin resistance variant had increased abundance,  
444 indicating that increased abundance is not a pervasive warfarin resistance mechanism. All five of  
445 the warfarin resistance variants whose activity we scored were WT-like. Taken together these  
446 data support the notion that warfarin resistance generally involves alterations to warfarin binding  
447 rather than abundance or activity. We analyzed one known warfarin sensitivity variant, W5X, and  
448 found that it is low abundance, suggesting that one should not exclude the possibility that any of  
449 the 52 other low abundance variants, if found in a person, also confer warfarin sensitivity.

450           While our VKOR variant abundance and activity data illuminates various aspects of  
451 VKOR's structure and function, the data have limitations. For example, neither assay captures  
452 variant effects on mRNA splicing. Both assays have limited dynamic ranges, meaning that subtle  
453 effects on abundance or activity cannot be discerned. In addition, both assays have inherent  
454 noise, largely arising from the limited number of cells we can sample due to the bottleneck of cell  
455 sorting. We account for this noise by filtering each dataset based on variant frequency and  
456 presenting a confidence interval for each abundance and activity score.

457           In the future, we envision that the assays we used could be employed to better understand  
458 VKOR's interaction with warfarin. Here, we could measure warfarin's effect on both variant  
459 abundance and activity, mapping the warfarin binding site more finely. In addition, we could  
460 identify warfarin resistance mutations that have not yet been observed in the clinic and group  
461 variants by their putative resistance mechanism. Overall, our work highlights the value of  
462 multiplexed assays of variant effect for better understanding protein structure, function and human  
463 variant effects.

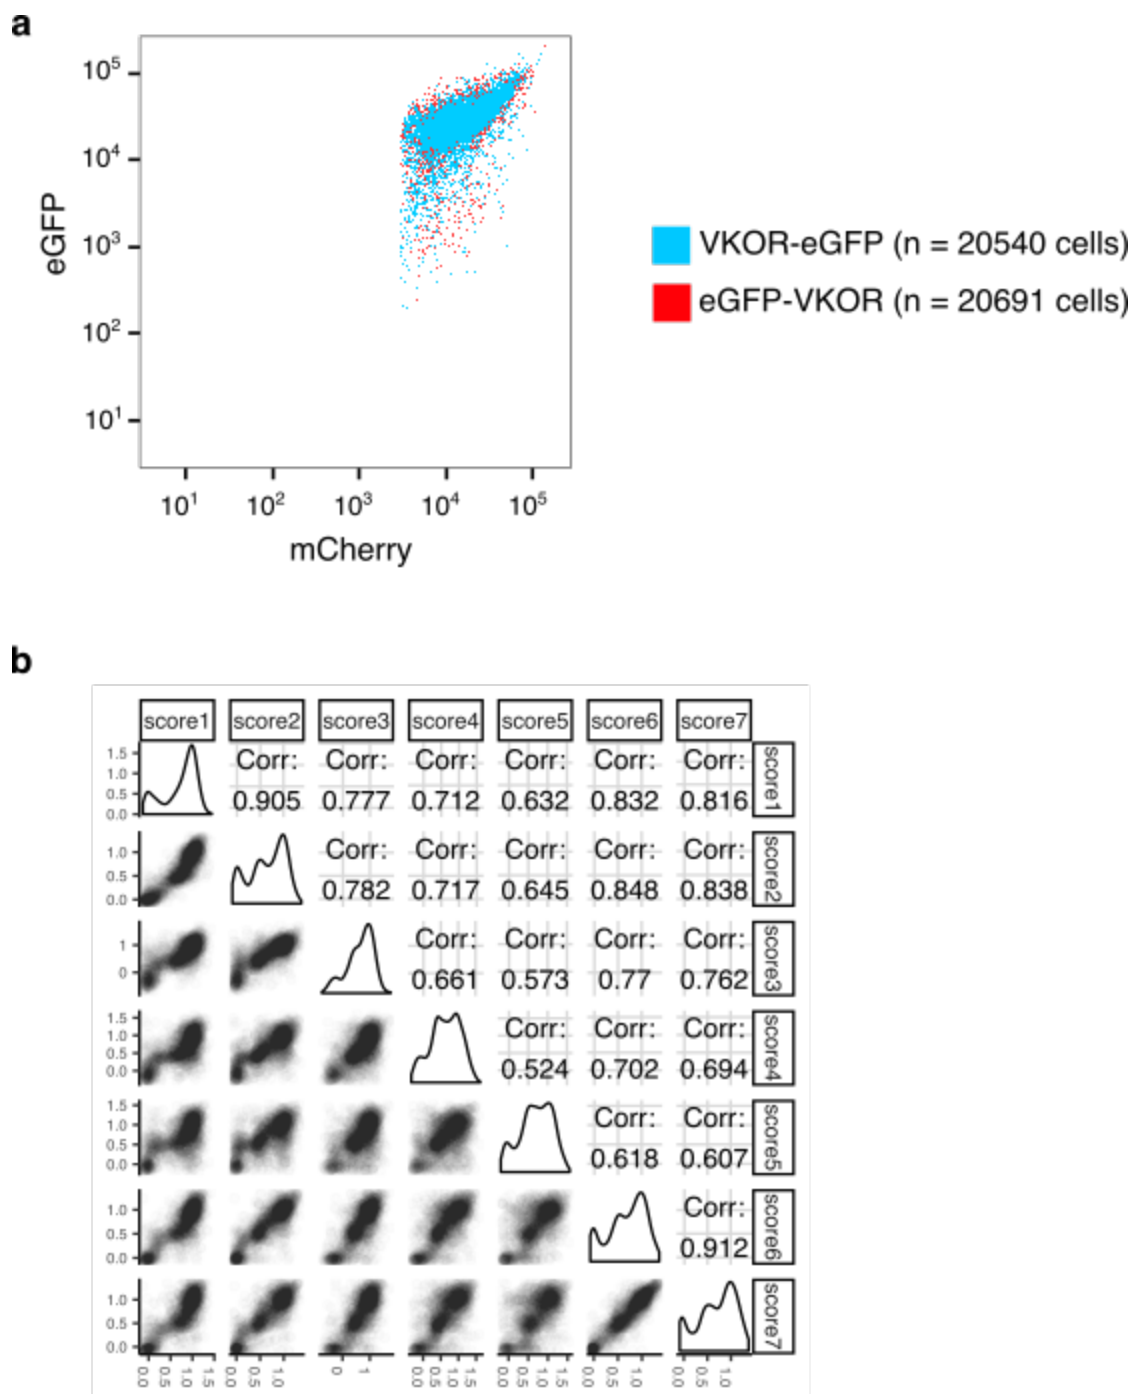

464

465 **Figure 1—figure supplement 1. VKOR abundance assay pilot experiment and replicate**  
 466 **correlations. a**, Scatterplot of eGFP vs. mCherry fluorescence for cells expressing either C-  
 467 terminally eGFP-tagged VKOR (VKOR-eGFP, blue) or N-terminally eGFP-tagged VKOR (eGFP-  
 468 VKOR, red). **b**, Pairwise abundance score correlations between replicate sorting experiments.

469 Seven VAMP-seq replicates were performed. Pearson's correlation coefficients are shown. Score  
470 numbers in this figure correspond to replicate numbers shown in Supplementary Table 1.

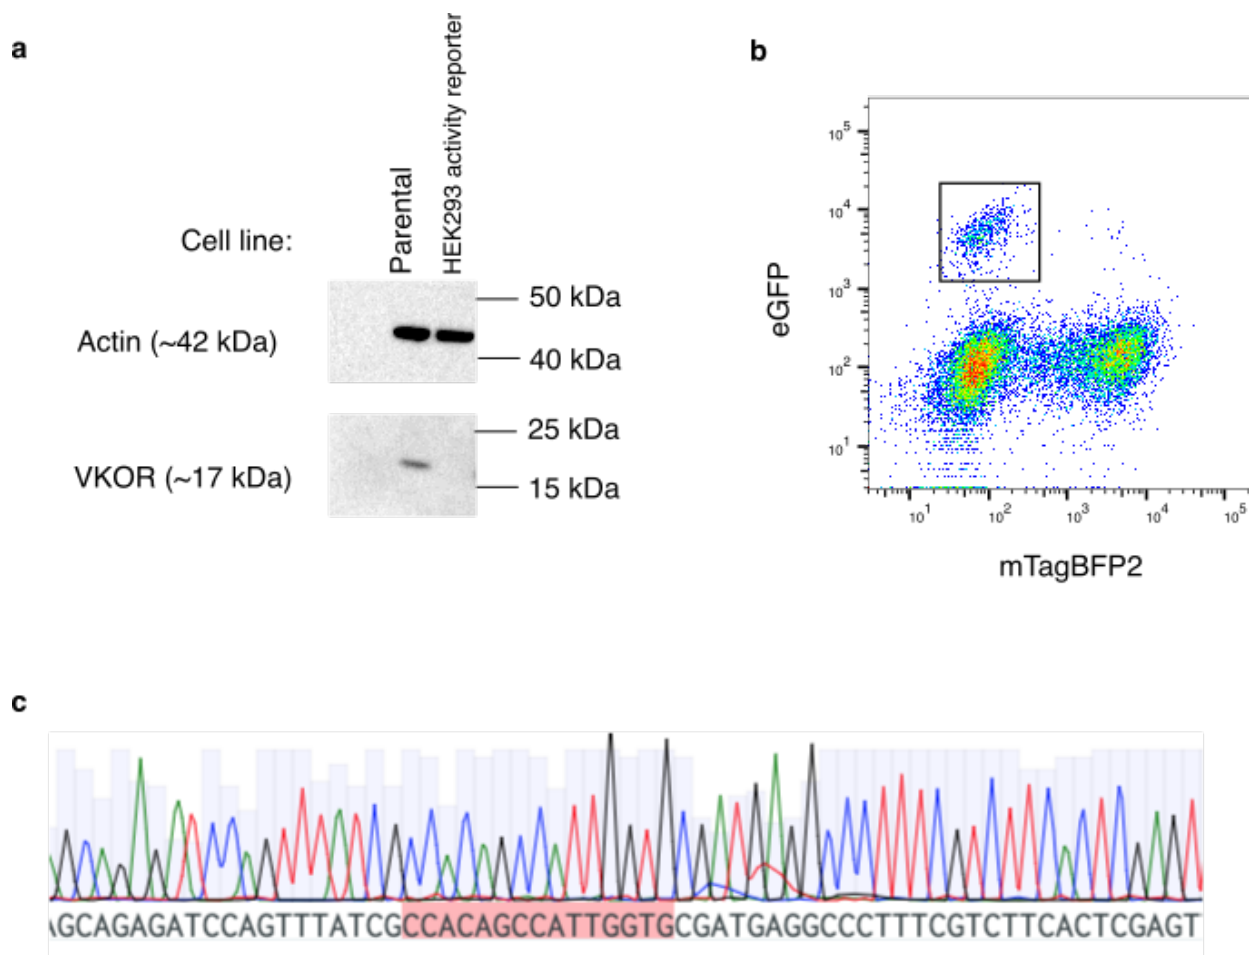

471

472 **Figure 2—figure supplement 1. HEK293 VKOR activity reporter cell line characterization.**

473 **a**, Western blot of parental cell line vs. HEK293 activity reporter cell line. Loading control is actin

474 (~42 kDa). VKOR was probed using an antibody generated against a peptide from the C-terminal

475 of VKOR (FRKVQEPQGKAKRH)(Hallgren et al., 2006). The band for VKOR at 17 kDa is visible

476 in the parental cell line but is not present in the HEK293 activity reporter cell line. **b**, Scatterplot

477 showing mTagBFP2 vs. eGFP mean fluorescence intensities for HEK293 activity reporter cells

478 recombined with a construct encoding WT VKOR followed by internal ribosomal entry sequence

479 and eGFP. The emergence of a distinct recombined population that is eGFP positive and

480 mTagBFP2 negative (black outline, n = 768 cells) supports the presence of a single landing pad

481 into the cell genome, and not multiple insertions. **c**, A chromatogram showing the barcode

482 sequence of the landing pad inserted at the AAVS1 locus in the HEK293 activity reporter cell line.



483 The presence of a single barcode, highlighted in red, instead of mixed peaks, supports insertion  
484 of one landing pad rather than multiple landing pads.

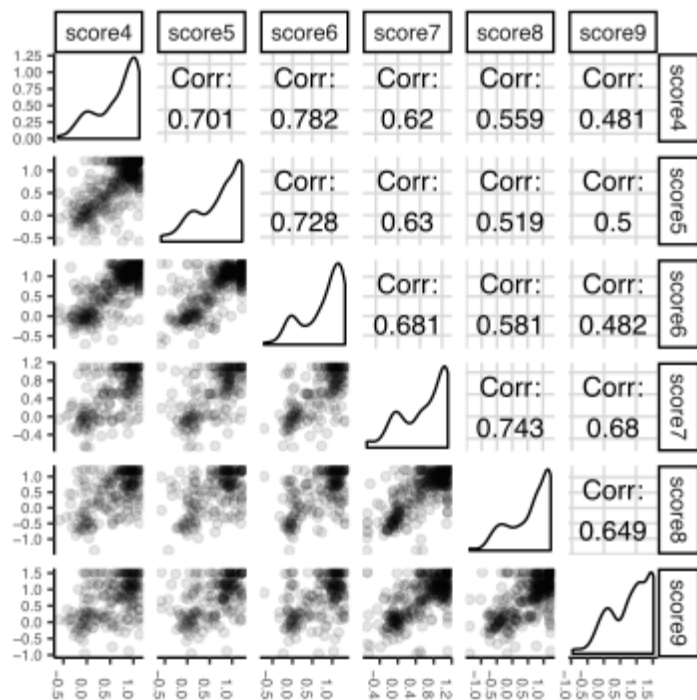

485

486 **Figure 2—figure supplement 2. Correlations of activity assay replicates.** Pairwise score  
487 correlations between replicate sorting experiments of VKOR activity. Six replicates of the activity  
488 assay were performed. Pearson's correlation coefficients are shown. Score numbers in this panel  
489 correspond to replicate numbers shown in Supplementary Table 2.

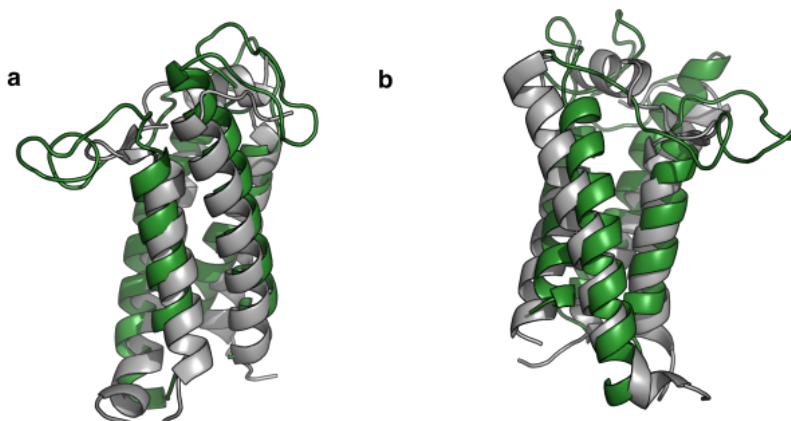

490

491 **Figure 3—figure supplement 1. Bacterial VKOR structure and EV-couplings folded model**

492 **are highly similar. a,** Pymol graphic showing overlap between EVcouplings-folded model of

493 VKOR (shown as a cartoon in green) compared to the bacterial structure (PDB: 4NV5, shown

494 as a cartoon in grey). **b,** shows the same two structures, rotated 120°C.

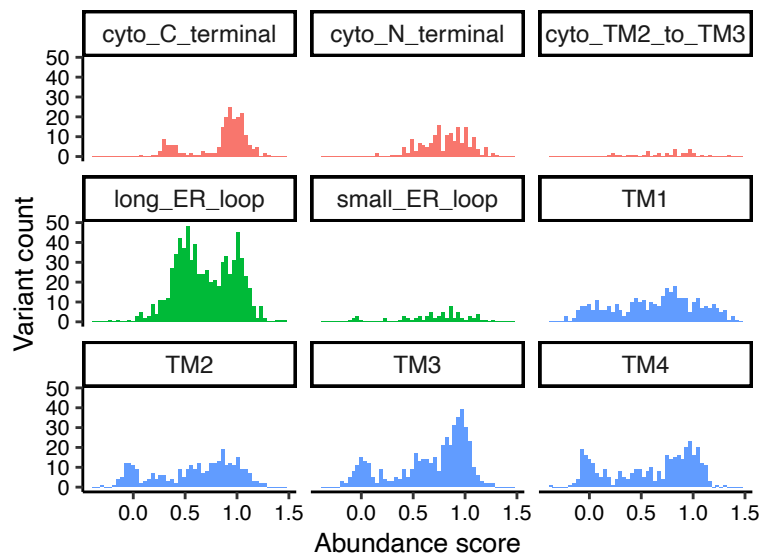

495

496 **Figure 3—figure supplement 2. Specific domain abundance scores.** Histograms of  
497 abundance scores for missense variants, grouped by domain and colored by cytoplasmic, ER  
498 luminal, or transmembrane localization.

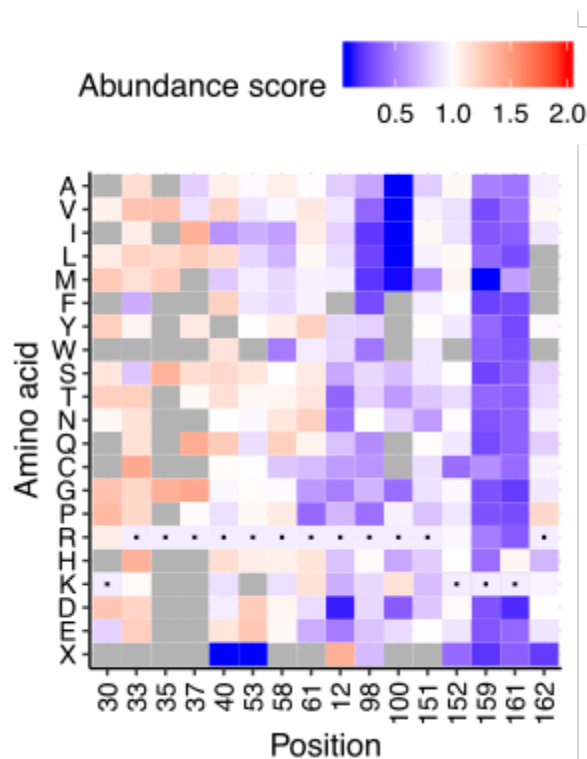

499

500 **Figure 4—figure supplement 1. TMD1-adjacent positive residues show pattern of**

501 **increased abundance.** Heatmap of abundance scores for all arginines and lysines in VKOR.

502 First four positions (K30, K33, K35, K37) are in or proximal to transmembrane domain 1.

503 Heatmap color indicates abundance scores scaled as a gradient between the lowest 10% of

504 abundance scores (blue), the WT abundance score (white) and abundance scores above WT

505 (red). Grey bars indicate missing variants. Black dots indicate WT amino acids.

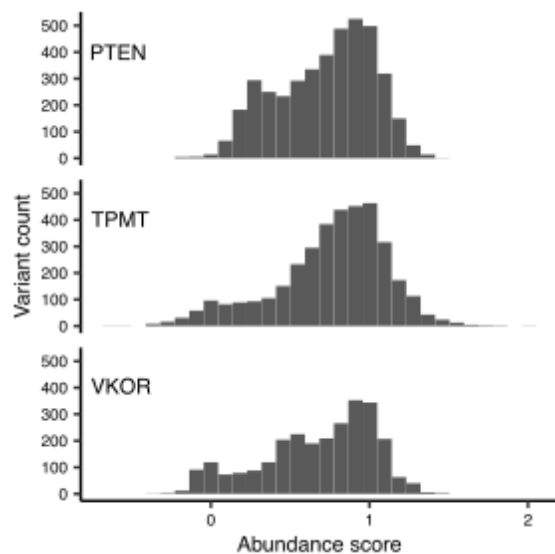

506

507 **Figure 4—figure supplement 2. Trimodality of missense variant abundance scores is**

508 **unique to VKOR.** Histograms of abundance scores for missense variants for three proteins:

509 PTEN, TPMT, and VKOR.

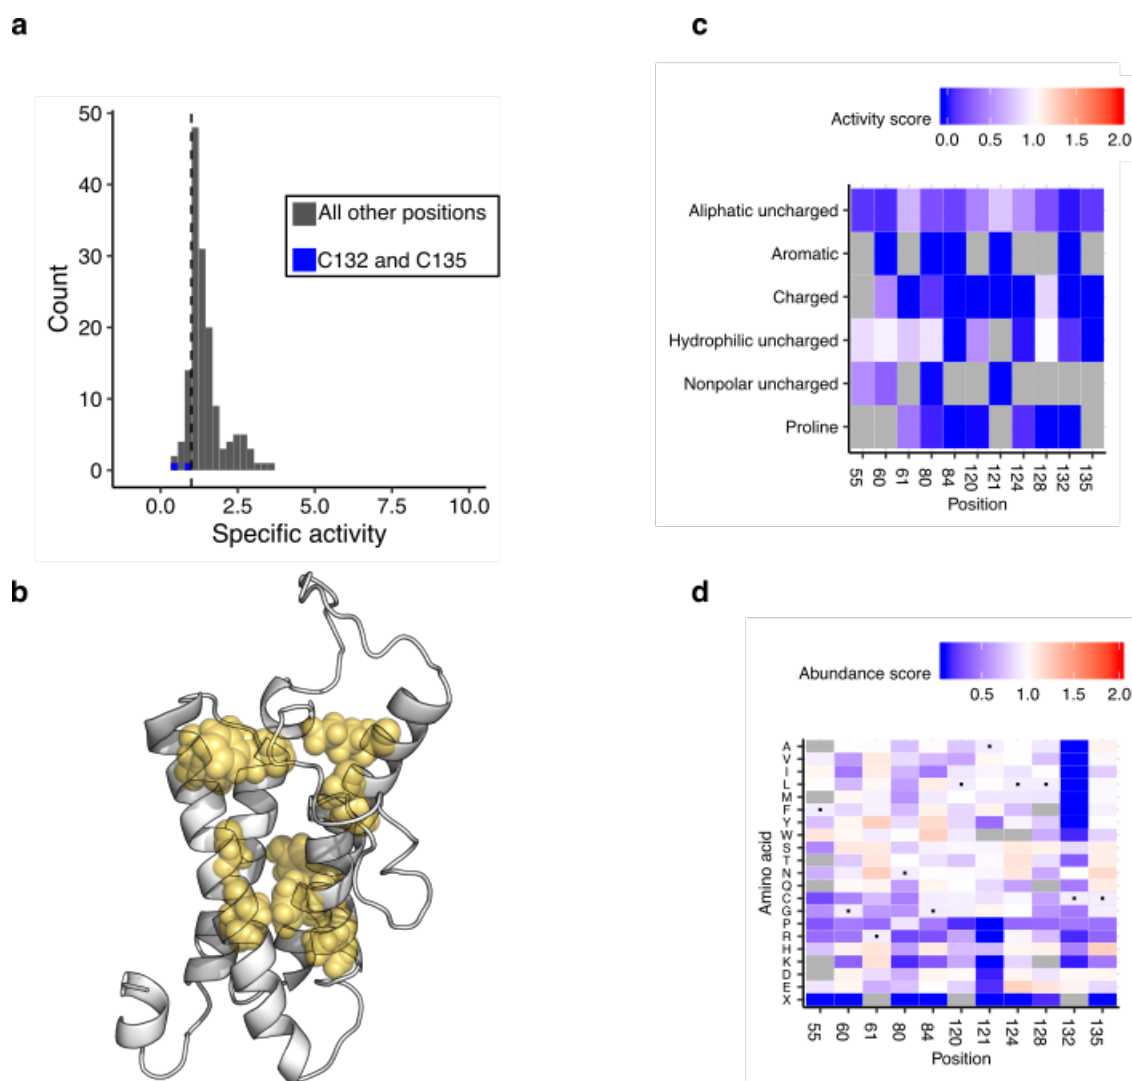

510

511 **Figure 5—figure supplement 1. VKOR active site analysis.** Histogram of specific activity,

512 with catalytic cysteines C132 and C135 labeled in blue. Dashed line demarcates bottom 12.5%.

513 **b**, Active site positions as defined by computational docking, shown on the homology model as

514 yellow spheres(Czogalla et al., 2016). **c**, Heatmap of activity scores for residues with lowest

515 12.5% of specific activity scores, collapsed by amino acid class. Color indicates activity scores

516 scaled as a gradient between the lowest 10% of activity scores (blue), the WT activity score

517 (white) and activity scores above WT (red). Grey indicates missing data. **d**, Heatmap of

518 abundance scores for residues with lowest 12.5% of specific activity scores. Color legend same  
519 as described in **c**, applied to abundance scores.



520

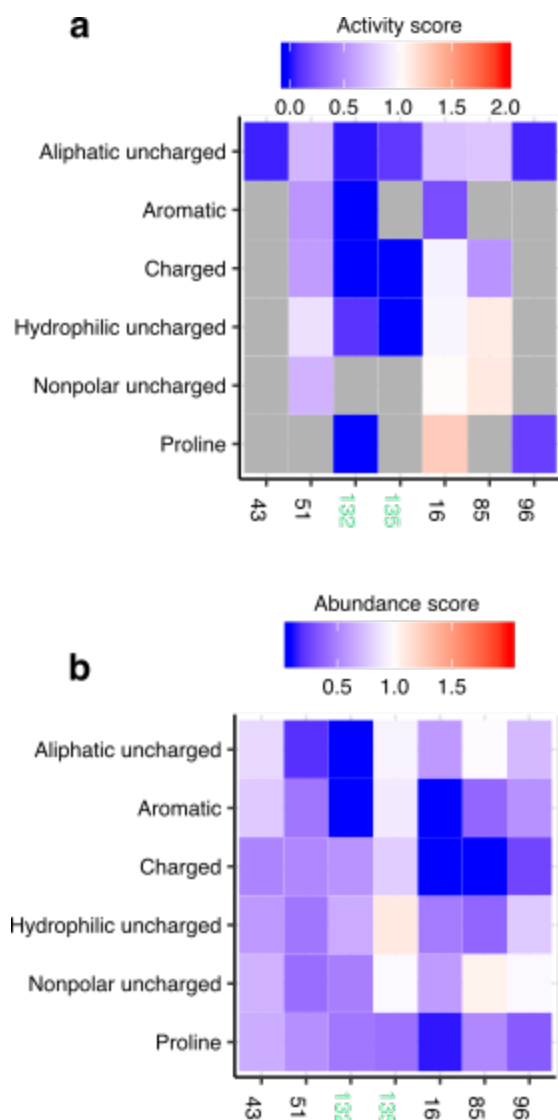

521

522 **Figure 5—figure supplement 2. Conserved cysteine analysis. a**, Heatmap of activity scores  
523 for cysteines. Catalytic cysteines C132 and C135 labeled in green. Color indicates activity  
524 scores scaled as a gradient between the lowest 10% of activity scores (blue), the WT activity  
525 score (white) and activity scores above WT (red). Grey indicates missing data. **b**, Heatmap of  
526 abundance scores for cysteines. Catalytic cysteines C132 and C135 labeled in green. Color  
527 legend same as described in **a**, applied to abundance scores.

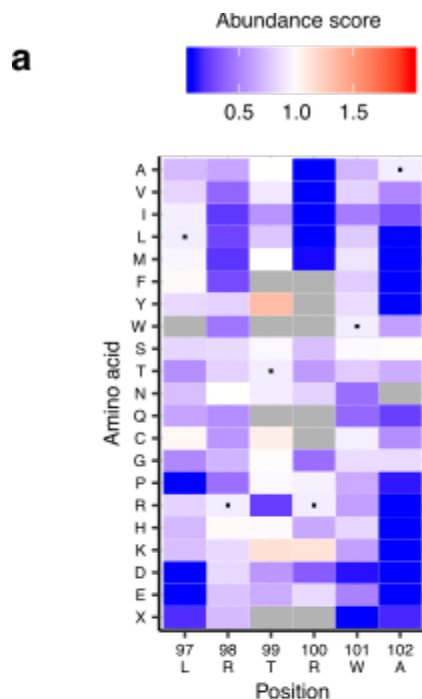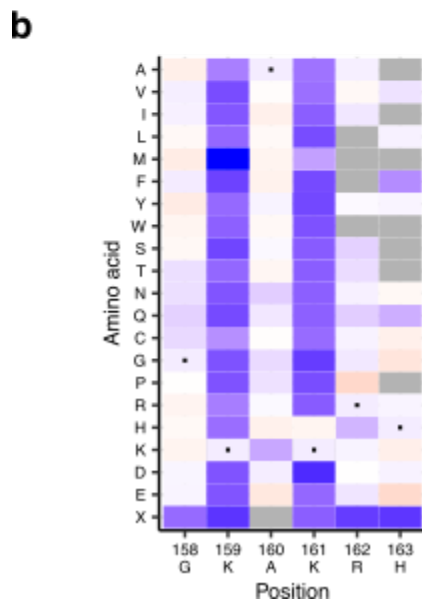

528

529 **Figure 5—figure supplement 3. VKOR localization motif analysis.** **a**, Heatmap of  
530 abundance scores for diarginine ER retention motif. X-axis shows residues and position. Color  
531 indicates abundance scores scaled as a gradient between the lowest 10% of abundance scores  
532 (blue), the WT abundance score (white) and abundance scores above WT (red). Grey indicates  
533 missing data. **b**, Heatmap of abundance score for dilysine ER retention motif. X-axis shows  
534 residues and position.

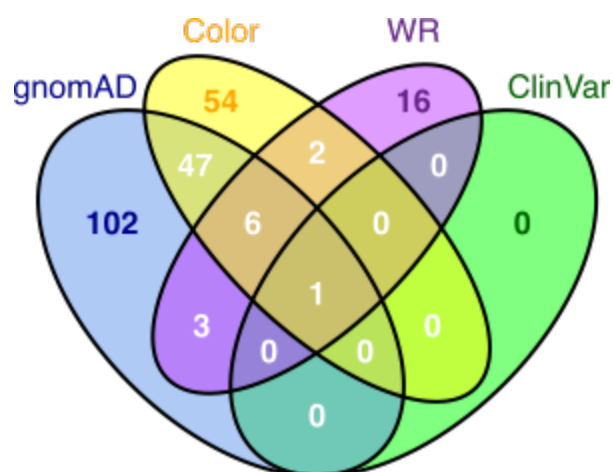

535

536 **Figure 6—figure supplement 1. Human VKOR variant curation summary.** Venn diagram of  
537 VKOR missense variants present in gnomAD v2 and v3, ClinVar, Color Genomics, a  
538 commercial genetic testing company, and literature-reported warfarin resistant variants.

| Replicate | Cells recombined | Cells sorted in four-way sort |
|-----------|------------------|-------------------------------|
| 1         | 256,324          | 200,000                       |
| 2         | 256,324          | 200,000                       |
| 3         | 111,570          | 183,000                       |
| 4         | 155,169          | 100,000                       |
| 5         | 105,000          | 103,000                       |
| 6         | 54,045           | 120,000                       |
| 7         | 54,045           | 125,000                       |

539

540 Supplementary Table 1. The seven replicates of VAMP-seq performed with cells recombined

541 and sorted for each.

| Replicate | Cells recombined | Cells sorted in four-way sort |
|-----------|------------------|-------------------------------|
| 1         | 85,492           | 200,000                       |
| 2         | 85,492           | 150,000                       |
| 3         | 85,492           | 100,000                       |
| 4         | 165,000          | 90,000                        |
| 5         | 165,000          | 90,000                        |
| 6         | 165,000          | 100,000                       |

542 Supplementary Table 2. The six replicates of the activity assay performed with cells recombined  
543 and sorted for each.

| <b>Position</b> | <b>Variant</b> | <b>Described in</b>                           |
|-----------------|----------------|-----------------------------------------------|
| 5               | W5*            | (Oldenburg et al., 2004)                      |
| 26              | A26T           | (Watzka et al., 2011)                         |
| 26              | A26P           | (Bodin et al., 2008)                          |
| 27              | L27V           | (Peoc'h et al., 2009)                         |
| 28              | H28Q           | (Watzka et al., 2011)                         |
| 29              | V29L           | (Oldenburg et al., 2004)                      |
| 34              | A34P           | (Harrington et al., 2011)                     |
| 36              | D36Y           | (Loebstein et al., 2007)                      |
| 36              | D36G           | (Watzka et al., 2011)                         |
| 41              | A41S           | (Rieder et al., 2005)                         |
| 45              | V45A           | (Oldenburg et al., 2004)                      |
| 52              | S52W           | (Watzka et al., 2011)                         |
| 52              | S52L           | (Schmeits et al., 2010)                       |
| 54              | V54L           | (Bodin et al., 2008; Harrington et al., 2008) |
| 56              | S56F           | (Watzka et al., 2011)                         |
| 58              | R58G           | (Oldenburg et al., 2004)                      |
| 59              | W59R           | (Wilms et al., 2008)                          |
| 59              | W59L           | (Watzka et al., 2011)                         |
| 59              | W59C           | (Watzka et al., 2011)                         |

|     |       |                          |
|-----|-------|--------------------------|
| 66  | V66M  | (Oldenburg et al., 2004) |
| 66  | V66G  | (Watzka et al., 2011)    |
| 68  | H68Y  | (Osman et al., 2006)     |
| 71  | G71A  | (Watzka et al., 2011)    |
| 77  | N77Y  | (Watzka et al., 2011)    |
| 77  | N77S  | (Watzka et al., 2011)    |
| 123 | I123N | (Watzka et al., 2011)    |
| 128 | L128R | (Oldenburg et al., 2004) |
| 139 | Y139H | (Watzka et al., 2011)    |

544

545 **Supplementary Table 3.** Variants found in humans that cause warfarin sensitivity or resistance,  
546 and references in which they were first reported.

547

548 **Additional supplementary files and source data**

549 **Supplementary Table 4.** Abundance and activity data for human variants found in ClinVar,  
550 gnomAD v2 and v3, and Color Genomics dataset.

551 **Supplementary Table 5.** Reagents and resources table.

552 **Supplementary Table 6.** Names and sequences for oligos used in this paper.

553 **Figure 1-source data 1.** VKOR variant abundance and activity scores.

554 **Figure 1-source data 2.** Flow cytometry for monoclonal validation of variants.

555 **Figure 3-source data 1.** Evolutionary couplings secondary structure predictions.

556 **Figure 3-source data 2.** Evolutionary couplings 3D contact predictions.

557 **Figure 3-source data 3.** Insertion energies from Elazar et al., 2016.

558 **Figure 5-source data 1.** VKOR positional abundance and activity scores.

559 **METHODS**

560 **General reagents, DNA oligonucleotides, and plasmids.**

561 Details on general reagents can be found in Supplementary Table 5. Unless otherwise  
562 noted, all chemicals were obtained from Sigma and all enzymes were obtained from New  
563 England Biolabs. *E. coli* were cultured at 37°C in Luria broth. All cell culture reagents were  
564 purchased from ThermoFisher Scientific unless otherwise noted. HEK 293T cells (ATCC CRL-  
565 3216) and derivatives thereof were cultured in Dulbecco's modified Eagle's medium  
566 supplemented with 10% fetal bovine serum, 100 U ml<sup>-1</sup> penicillin, and 0.1 mg ml<sup>-1</sup> streptomycin.  
567 Cells were induced with 2.5 ug mL<sup>-1</sup> doxycycline. Cells were passaged by detachment with  
568 trypsin-EDTA 0.25%, and cells were prepared for sorting by detachment with versene. All cell  
569 lines tested negative for mycoplasma. Because our activity assay is vitamin-K dependent, all  
570 activity assays were done with the same lot of FBS to ensure similar concentrations of vitamin K  
571 in each replicate.

572 All synthetic oligonucleotides were obtained from IDT and can be found in  
573 Supplementary Table 6. All non-library-related plasmid modifications were performed with  
574 Gibson assembly(Gibson et al., 2009).

575

576 **Library construction**

577 A gBLOCK with a codon-optimized sequence for human VKOR was ordered from IDT. It  
578 was then cloned into the vector pHSG298 (Clontech). Saturation mutagenesis primers were  
579 designed for each codon in VKOR from positions 2 to 163(Jain and Varadarajan, 2014) and  
580 ordered resuspended from IDT. Forward and reverse primers for each position were mixed at 2.5  
581 mM, and used in a PCR reaction with 125 pg of pHSG298-VKOR, 5% DMSO, and 5 uL of KAPA  
582 Hifi Hotstart 2X ReadyMix. PCR products were visualized on a 0.7% agarose gel to confirm  
583 amplification of the correct product.

584



585 PCR products were then quantified using the Quant-iT PicoGreen dsDNA Assay kit  
586 (Invitrogen) using DNA control curves done in triplicate. To pool, a total amount of DNA for  
587 each reaction was calculated that maximized the volume to be drawn from the lowest  
588 concentration PCR product. Pooled PCR products were cleaned and concentrated using  
589 Zymogen Clean and Concentrate kit and then gel extracted. The pooled library was  
590 phosphorylated with T4 PNK (NEB), incubated at 37°C for 30 minutes, 65°C for 20 minutes, and  
591 then 4° indefinitely. 8.5 uL of this phosphorylated product was combined with 1 uL of 10X T4  
592 ligase buffer (NEB) and 0.5 uL of T4 DNA ligase (NEB) to make a 10 uL overnight ligation reaction.  
593 This reaction was incubated at 16°C overnight.

594 The overnight ligation was then cleaned and concentrated (Zymogen) and eluted in 6 uL  
595 of ddH<sub>2</sub>O. 1 uL of this ligation was then transformed into high efficiency *E. coli* using  
596 electroporation at 2 kV. Each reaction contained 1 uL of ligation (or ligation control or pUC19 10  
597 pg/uL) and 25 uL of *E. coli*. 975 uL of pre-warmed SOC media was added to each cuvette after  
598 electroporation, transferred to a culture tube, and recovered at 37°C, shaking for 1 hour. At 1  
599 hour, 1 and 10 uL samples from all cultures were taken and plated on appropriate media (LB +  
600 kanamycin for ligation and ligation control; LB + ampicillin for pUC19), the remaining 989 uL was  
601 used to inoculate a 50 mL culture (+ kanamycin). Plates and 50 mL culture were incubated at  
602 37°C overnight (shaking for 50 mL culture). Colonies on plates were then counted, and counts  
603 were used to calculate how many unique molecules were transformed to gauge coverage of the  
604 library. 50 mL culture was spun down and midiprepmed.

605 To transfer the library from pKan to the recombination vector, the pKan library and  
606 recombination vector were digested with XbaI and AflIII for 1 hour at 65°C. The library and cut  
607 vector were then gel extracted. The library was then ligated with the cut vector at 5:1 using T4  
608 ligase, overnight at 16°C. The ligation was heat inactivated the next morning, clean and  
609 concentrated. Another high efficiency transformation was performed the same as described  
610 above, except this ligation was plated on LB + ampicillin (antibiotic switching strategy). Plates and

611 50 mL culture were incubated at 37°C overnight (shaking for 50 mL culture). Colonies on plates  
612 were then counted, and counts were used to calculate how many unique molecules had been  
613 transformed to gauge coverage of the library. A 50 mL culture was spun down and midiprepped.

614 To barcode individual variants, plasmid library harvested from midiprep was digested with  
615 EcoRI-HF and NdeI at 37°C for 1 hour, 65°C for 20 minutes. Barcode oligos were ordered from  
616 IDT, resuspended at 100 uM, and then annealed by combining 1 uL each of primer with 4 uL  
617 CutSmart Buffer and 34 uL ddH<sub>2</sub>O and running at 98°C for 3 minutes followed by ramping down  
618 to 25°C at -0.1°C/second. After annealing, 0.8 uL of Klenow polymerase (exonuclease negative,  
619 NEB) and 1.35 uL of 1 mM dNTPS was then combined with the 40 uL of product to fill in the  
620 barcode oligo (cycling conditions: 25°C for 15:00, 70°C for 20:00, ramp down to 37°C at -0.1°C/s).  
621 Digested vector and barcode oligo were then ligated overnight at 16°C.

622 The overnight ligation was then cleaned and concentrated and eluted in 6 uL of ddH<sub>2</sub>O. 1  
623 uL of this ligation was then transformed into high efficiency *E. coli* using electroporation at 2 kV.  
624 Each reaction contained 1 uL of ligation (or ligation control or pUC19 10 pg/uL) and 25 uL of *E.*  
625 *coli*. 975 uL of pre-warmed SOC media was added to each cuvette after electroporation,  
626 transferred to a culture tube, and recovered at 37°C, shaking for 1 hour. At 1 hour, 1 and 10 uL  
627 samples from water and pUC19 cultures were taken and plated on LB supplemented with  
628 ampicillin. For ligation and ligation control, four flasks were prepared with 50 mLs of LB and  
629 ampicillin, and then 500 uL, 250 uL, 125 uL, 62.5 uL was sample from the 1 mL of recovery and  
630 transferred into a corresponding flask. From those flasks, 1 uL, 10 uL, and 100 uL, were sampled  
631 and plated onto LB ampicillin plates. Plates and 50 mL culture were incubated at 37°C overnight.  
632 Colonies on plates were then counted, and counts were used to calculate how many unique  
633 molecules were transformed to gauge number of barcodes. Flask with the target number of  
634 barcodes was then spun down and midiprepped.

635

636 **Cell line description**

637 *VAMP-seq assay cell line*

638 HEK293T cells with a serine integrase landing pad integrated at the AAVS1 locus were  
639 used (Matreyek et al., 2017).

640

641 *Activity assay cell line*

642 We used a previously published reporter cell line (Haque et al., 2014) and inserted a  
643 recombinase-based landing pad at the AAVS1 safe harbor locus using a previously published  
644 strategy (Matreyek et al., 2017). Single cell clones were transfected with TALENs for AAVS1 and  
645 the landing pad plasmid, and single cell clones were sorted. Presence of one landing pad was  
646 confirmed by 1) barcode sequencing of the landing pad and 2) co-transfection experiment with  
647 GFP and mCherry. From this, we moved forward with one clone demonstrated to have only one  
648 landing pad present (clone 45).

649 gRNAs to delete portions of the first exon of both *VKORC1* and *VKORC1L1* were ordered  
650 and cloned into pSpCas9(BB)-2A-GFP (PX458), which was a gift from Feng Zhang (Addgene  
651 plasmid #48138 ; <http://n2t.net/addgene:48138> ; RRID:Addgene\_48138). Clone 45 was then  
652 transfected with these four plasmids, and single cells were sorted based on GFP positivity.  
653 Disruption of *VKORC1* and *VKORC1L1* was confirmed by performing nested PCR, TA cloning,  
654 and then sequencing of products. We detected three alleles for both *VKORC1* and *VKORC1L1*,  
655 indicating that these loci are triploid in HEK293 cells.

656 A Western blot was also used to confirm absence of VKOR protein product in our activity  
657 reporter cell line. Protein lysates were harvested from ~1 million cells using 100 uL NP40 lysis  
658 buffer with freshly prepared protease inhibitor cocktail and 1 mM PMSF. Protein lysates were  
659 Qubited for concentration, and 20 ug of each protein lysate was loaded. 4-12% BisTris NuPage  
660 gel (Thermo Fisher) was used with MES buffer + 500µl of antioxidant added to the inner chamber.  
661 The gel ran at 150V for 90 min. Gel was then transferred to Nitrocellulose using 1X transfer buffer  
662 20% EtOH at 24V for 1 hour on ice. The blot was washed for 5 minutes with 1X TBS-T 0.1%

663 Tween 3 times. Blot was then blocked for overnight 1X TBS-T 0.1% Tween + 5% Milk. Blot was  
664 then washed for 5 minutes with 1X TBS-T 0.1% Tween 3 times. Blot was then cut in half at the  
665 between the 25kDa and 35kDa molecular weight markers. The bottom blot was incubated with:  
666  $\alpha$ VKOR 1:1000 + 1X TBS-T 0.1% Tween + 5% Milk. The top blot was incubated with  $\alpha$ beta-actin  
667 dHRP 1:1000+ 1X TBS-T 0.1% Tween + 5% Milk. Both blots were incubated with their primary  
668 antibodies overnight at 4°C. The  $\alpha$ VKOR blot was washed for 5 minutes with 1X TBS-T 0.1%  
669 Tween 3 times. The  $\alpha$ VKOR blot was then incubated with 1:10,000 secondary anti-mouse-HRP  
670 (GE Healthcare NA931V) + 1X TBS-T 0.1% Tween + 5% Milk for one hour. The  $\alpha$ beta-actin dHRP  
671 blot remained in primary antibody during this time, as no secondary antibody is needed for a direct  
672 HRP conjugate. Both blots were then washed for 5 minutes with 1X TBS-T 0.1% Tween 3 times.  
673 Blots were then incubated with Supersignal West Dura Extended Duration Substrate (Thermo  
674 Fisher). 500 $\mu$ l of both substrates incubated on blot for 5 min. Blots were then dried by kimwipe  
675 and exposed using the colorimetric and chemiluminescence functions on the BioRad ChemiDoc  
676 MP (Biorad).

677

#### 678 *Recombination of variants in cell lines: Abundance assay*

679 Cells were transfected in six well plates, 250,000 cells per well (12-24 wells transfected  
680 total for each experiment). Sequential transfections were performed. On day 1, 3  $\mu$ g of pCAG-  
681 NLS-Bxb1 was diluted in 250  $\mu$ L of OptiMEM and 6  $\mu$ L of Fugene (Promega). On day 2, 3  $\mu$ g of  
682 barcoded library was diluted in 250  $\mu$ L of OptiMEM and 6  $\mu$ L of Fugene6 and transfected. 48  
683 hours after this second transfection, cells were induced with doxycycline at a final concentration  
684 of 2.5  $\mu$ g/mL.

685

#### 686 *Recombination of variants in cell lines: Activity assay*

687 Cells were transfected in six- well plates, 500,000 cells per well (18-24 wells transfected  
688 total for each experiment). 272 ng of pCAG-NLS-Bxb1 was diluted in 125  $\mu$ L of OptiMEM with 2.7

689 ug of barcoded library. 2.25 uL of Lipofectamine 3000 (Thermo Fisher) was diluted in 125 uL of  
690 OptiMEM in a separate tube. The DNA mixture was then added to the Lipofectamine 3000 mixture  
691 and incubated at room temperature for 15 minutes. Transfection mixture was then added  
692 dropwise to one six-well plate. Cells were induced with doxycycline 48 hours after transfection,  
693 with a final concentration of 2.5 ug/mL doxycycline .

694

#### 695 *Enrichment sorting for recombined cells*

696 Cells were washed once with PBS, then dissociated with versene. Media was added to  
697 dilute EDTA, and cells transferred to 15 mL conical and spun down at 300 x g for 4 minutes. Media  
698 was aspirated off, and cells were resuspended in PBS, then filtered through a 35 um nylon mesh  
699 filter. Cells were sorted on a BD Aria III FACS machine. mTagBFP2, expressed from the  
700 unrecombined landing pad, was excited with a 405 nM laser. Recombined cells either expressed  
701 mCherry (abundance) or eGFP (activity), and these were excited by a 561 nm laser and a 488  
702 nm laser, respectively. Samples were gated for live cells using FSC-A and SSC-A, then singlets  
703 using SSC-H vs. SSC-W, FSC-H vs. FSC-W. For activity assay reporter cell line, cells were then  
704 sorted for DsRed positivity to ensure robust expression of reporter. Cells that had successfully  
705 recombined a single VKOR variant were gated on recombinant mTagBFP2 negativity and either  
706 mCherry positivity (abundance) or eGFP positivity (activity) (see [Supplementary Fig. 2b](#) for gating  
707 example). Recombined cells were sorted on “Yield” mode in the BD Diva software and grown out  
708 for 3-5 days.

709

#### 710 *Abundance assay quartile sorting*

711 Recombined cells were run on a BD Aria III FACS machine. Cells were prepared for  
712 sorting as described above, and were then gated for live, recombined singlets. A ratio of  
713 eGFP/mCherry was created using the BD Diva software as a unique parameter, and the  
714 histogram of this ratio was divided into four equal bins. Each quartile was sorted into a 5 mL tube

715 on “4-Way Purity” mode. Sorted cells were grown out for 2-4 days post sorting to ensure enough  
716 DNA for sequencing. The details of replicate sorts for activity assay are in Supplementary Table  
717 1.

718

#### 719 *Antibody conjugation*

720 Factor IX Gla domain antibody specific for carboxylation was conjugated to APC following  
721 LYNX Rapid APC Antibody Conjugation Kit instructions. Antibody was resuspended at 1 mg/mL  
722 in nuclease-free water. 1 uL of Modifier reagent was then added for every 10 uL of antibody and  
723 mixed by pipetting. That mixture was then pipetted directly onto the LYNX lyophilized mix and  
724 gently mixed by pipetting up and down twice. The conjugation mixture was then capped and  
725 incubated in the dark at room temperature overnight. After overnight incubation, 1 uL of Quencher  
726 reagent was added for every 10 uL of antibody used and left to incubate for 30 minutes. At that  
727 point, antibody was divided into 20 uL aliquots to be used for replicate experiments and stored at  
728 -20°C.

729

#### 730 *Activity assay antibody staining and quartile sorting*

731 Cells were plated in six-well plates at 500,000 cells per well with D10 media with no  
732 doxycycline. All replicates were performed with 18-24 wells of cells total. After 24 hours,  
733 doxycycline was added to cells to induce expression of reporter and VKOR variant. Cells were  
734 then incubated with doxycycline for 48 hours. On day of cell sorting, each six well was washed  
735 with cold PBS, dissociated with 200 uL of versene, and then resuspended in 1 mL of phenol red-  
736 free DMEM + 1% FBS and transferred to a 5 mL FACS tube. Cells were spun at 300 x g, then  
737 washed once with 1 mL of phenol red-free DMEM + 1% FBS. Cells were spun at 300 x g, and  
738 after aspirating supernatant, cell pellet was resuspended in 100 uL of antibody diluted 1:100 in  
739 phenol red-free DMEM + 1% FBS. Cells were incubated in antibody for 20 minutes at 4°C in the  
740 dark, with vortexing at five minute intervals to ensure staining. After 20 minutes, 1 mL of staining

741 buffer was added to each tube to dilute out antibody. Cells were spun at 300 x g, washed twice  
742 more similarly with staining buffer, then resuspended in 200  $\mu$ L. At this point, all tubes were pooled  
743 and filtered to remove clumps. Cells were then sorted using a FACSAria III (BD Biosciences) into  
744 bins based on their APC intensity. First, live, single, recombinant cells were selected as described  
745 above. A histogram of APC was created and gates dividing the library into four equally populated  
746 bins based on APC fluorescence intensity were drawn. The details of replicate sorts for activity  
747 assay are in Supplementary Table 2.

748

#### 749 **gDNA prep, barcode amplification, and sequencing**

750 Cells were then collected, pelleted by centrifugation and stored at  $-20^{\circ}\text{C}$ . Genomic DNA  
751 was prepared using a DNEasy kit, according to the manufacturer's instructions (Qiagen), with the  
752 addition of a 30 min incubation at  $37^{\circ}\text{C}$  with RNase in the re-suspension step. Eight  $50\ \mu\text{L}$  first-  
753 round PCR reactions were each prepared with a final concentration of  $\sim 50\ \text{ng}\ \mu\text{L}^{-1}$  input genomic  
754 DNA,  $1 \times$  Q5 High-Fidelity Master Mix and  $0.25\ \mu\text{M}$  of the KAM499/VKORampR 1.1 primers. The  
755 reaction conditions were  $98^{\circ}\text{C}$  for 30 s,  $98^{\circ}\text{C}$  for 10 s,  $65^{\circ}\text{C}$  for 20 s,  $72^{\circ}\text{C}$  for 60 s, repeat 5 times,  
756  $72^{\circ}\text{C}$  for 2 min,  $4^{\circ}\text{C}$  hold. Eight  $50\ \mu\text{L}$  reactions were combined, bound to AMPure XP (Beckman  
757 Coulter), cleaned and eluted with  $21\ \mu\text{L}$  water. Forty percent of the eluted volume was mixed with  
758 Q5 High-Fidelity Master Mix; VKOR\_indexF\_1.1 and one of the indexed reverse primers,  
759 PTEN\_seq\_R1a through PTEN\_seq\_R2a, were added at  $0.25\ \mu\text{M}$  each. These reactions were  
760 run with Sybr Green I on a BioRad MiniOpticon; reactions were denatured for 3 minutes at  $95^{\circ}\text{C}$   
761 and cycled 20 times at  $95^{\circ}\text{C}$  for 15s,  $60^{\circ}\text{C}$  for 15s,  $72^{\circ}\text{C}$  for 15s with a final 3 min extension at  
762  $72^{\circ}\text{C}$ . The indexed amplicons were mixed based in relative fluorescence units and run on a 1%  
763 agarose gel with Sybr Safe and gel extracted using a freeze and squeeze column (Bio-Rad). The  
764 product was quantified using Kapa Illumina Quant kit.

765



## 766 **Subassembly**

767 Barcoded VKOR library was subassembled using a MiSeq 600 kit (Illumina). Two  
768 amplicons were generated, one forward, one reverse. PCR reactions were each prepared with  
769 ~500 ng input plasmid DNA, 1 × KAPA High-Fidelity Master Mix and 0.25 μM of the  
770 VKOR\_SA\_amp\_F/VKOR\_SA\_amp\_R or VKOR\_SA\_for\_amp\_R2.0/VKOR\_SA\_rev\_amp\_F2.0  
771 primers. PCR reactions were run at 95°C for five minutes, then cycled 15 times at 98°C for 0:20,  
772 60°C for 0:15, 72°C for 0:30, with a final extension at 72°C for 2:00. Amplicons (741 bp) were gel  
773 extracted on a 1.0% gel run at 130V for 35 mins. The product was quantified using Qubit and  
774 Kapa Illumina quant kit. Read lengths were as follows: 289 bp forward read, 18 bp index1, 18 bp  
775 index 2 (index = barcode forward and reverse). All reads sharing a common barcode sequence  
776 were collapsed to form the consensus variant sequence, resulting in 175,052 barcodes after  
777 filtering.

778

## 779 **Barcode counting and variant calling**

780 Enrich2 was used to quantify barcodes from bin sequencing, using a minimum quality filter  
781 of 20 (Rubin et al., 2017). FASTQ files containing barcodes and the barcode map for VKOR were  
782 used as input for Enrich2. Enrich2 configuration files for each experiment are available on the  
783 GitHub repository. Barcodes assigned to variants containing insertion, deletions, or multiple  
784 amino-acid alterations were removed from the analysis.

785

## 786 **Calculating scores and classifications**

787 Scores and classifications were assigned using previously published analysis pipeline  
788 (Matreyek et al., 2018). Briefly, for each protein variant, frequencies in each bin were calculated  
789 by dividing counts by total counts. From there, we filtered variants based on the number of  
790 experiments in which it was observed ( $F_{\text{expt}} = 2$ ) and their frequency ( $F_{\text{freq}} = 10^{-4}$ ), after noticing  
791 that low frequency variants introduced noise to the analysis. These frequencies were then each



792 weighted by multiplying by 0.25, 0.5, 0.75, and 1 in a bin-wise fashion. We generated a replicate  
793 score for each variant by using min-max normalization: normalizing to the median weighted  
794 average of the nonsense distribution set at 0 and the median weighted average of the  
795 synonymous distribution set at 1. We then averaged those scores for a final, experiment-wide  
796 variant score. Standard deviation and standard error were also calculated for each variant, and  
797 95% confidence intervals were estimated using standard error, assuming a normal distribution.  
798 Abundance and activity classifications were assigned by assessing variant score and confidence  
799 intervals in relation to synonymous variant distribution. To do this, we established a cut-off that  
800 separated the 5% of synonymous variants with the lowest abundance (or activity) scores from the  
801 95% of synonymous variants with higher abundance (or activity) scores. Variants with both scores  
802 and upper confidence intervals below this threshold were classified as “low,” while those with  
803 scores below but upper confidence above were classified as “possibly low.” Variants with scores  
804 and lower confidence intervals above the threshold were classified as “WT-like”, while those with  
805 scores above lower confidence intervals below the threshold were classified as “possibly WT-  
806 like.” Finally, another threshold was set that separated the 5% of synonymous variants with the  
807 highest scores from the rest of the synonymous distribution. Variants that had scores above this  
808 threshold, with lower confidence intervals above the lower threshold were classified as “high.”

809

### 810 **Windowed abundance and activity analysis**

811 Windowed averages of abundance and activity scores were calculated using a window  
812 length of 10 positions with center alignment. Scores were calculated for both charged amino acids  
813 (R, K, H, D, E,) and aliphatic amino acids (G, A, V, I, L).

814

### 815 **Evolutionary couplings analysis**

816 EVcouplings extracts the constraints between pairs of residues, as evidenced in  
817 alignments of homologous sequences: first homologous sequences must be collected and

818 aligned, and then a model of statistical energy costs and benefits between residues is fit to explain  
819 the sequence variation in the alignment. We collected an alignment of 2770 sequences using  
820 jackhammer (<http://hmmer.org/>) to query the human VKOR sequence against UniRef100  
821 (<https://www.uniprot.org/uniref/>), with a bitscore per residue cutoffs of 0.4 and 7 search iterations.  
822 We predicted secondary structures where the summed strength of couplings at would-be alpha  
823 helix and beta strand contacts scored above 1.5 for alpha helices and 0.75 respectively, for two  
824 or more consecutive residues. We extended the called helices and strands by one residue on  
825 each side for a minimum structure size of four residues. All methods used for building alignments,  
826 training the model, folding, and predicting secondary structure are part of the EVcouplings  
827 software (<https://evcouplings.org/>) (Hopf et al., 2019).

828

### 829 **Homology modeling**

830 A homology model of human VKOR was made by accessing I-TASSER (Yang et al., 2015)  
831 and using PDB structure 4NV5 as a template for threading. Model1 from results was used for all  
832 figures in this paper.

833

### 834 **Hierarchical clustering**

835 Hierarchical clustering was performed on abundance score vectors for each position using  
836 the hclust function in R. Dendrogram for hierarchically clustered heatmap was drawn using  
837 dendextend package (version 1.12.0).

838

### 839 **Active site residue analysis**

840 Activity and abundance scores were rescaled so that the lowest score present in the  
841 dataset was set at 0, and the highest score at 1. A ratio of rescaled activity to rescaled abundance  
842 (specific activity) was then calculated for every variant. Using variant specific activity scores,  
843 median specific activity was calculated for each position. Threshold for classification as an active

844 site position was drawn based on scores of known redox cysteines at positions 132 and 135,  
845 resulting in lowest 12.5% of median specific activity scores being classified as active site residues.  
846 We additionally required that any position within this group had been scored for at least four  
847 variants to eliminate noise from poor sampling.

848

#### 849 **Data availability**

850 All raw sequence data and function scores are freely available for all academic users by  
851 non-exclusive license under reasonable terms to commercial entities that have committed to open  
852 sharing of VKOR sequence variants and under a free non-exclusive license to non-profit entities.  
853 The Illumina raw sequencing files and barcode-variant maps can be accessed at the NCBI Gene  
854 Expression Omnibus (GEO) repository under accession number GSE149922. The data  
855 presented in the manuscript are available as Supplementary Data files.

856

#### 857 **Code availability**

858 Code for analysis is available at <http://github.com/FowlerLab/VKOR>.

859 The code used to train the evolutionary couplings model is available at the EVcouplings  
860 GitHub repository (<https://github.com/debbiemarkslab/EVcouplings>). The data used to train the  
861 model is publically available at uniprot (<https://uniprot.org>).

862

#### 863 **ACKNOWLEDGEMENTS**

864 We thank D. Nickerson and M. Dunham for helpful conversations in analyzing the data  
865 and writing the manuscript, A. Leith of the UW Foege Flow Lab and D. Prunkard of the UW  
866 Pathology Flow Cytometry Core Facility for assistance with cell sorting, and all members of the  
867 Fowler lab for helpful feedback on figures. This work was supported by the NIH (R24GM115277  
868 P01GM116691), by the Canada Excellence Research Chairs Program, and by a Canadian  
869 Institutes of Health Research Foundation Award. M.A.C. was supported by a National Science

870 Foundation Graduate Research Fellowship. D.M. and N.J.R. thank the Chan Zuckerberg Initiative  
871 DAF (grant number 2018-191853) for financial support.

872

### 873 **AUTHOR CONTRIBUTIONS**

874 M.A.C. carried out abundance and activity experiments and analyzed the data. N.R. and  
875 D.M. performed evolutionary couplings analysis. J.S. prepared samples for next-generation  
876 sequencing. K.S. cloned variants for abundance assay validation. K.A.M. provided abundance  
877 analysis framework. D.D. provided human *VKORC1* variants from Color Genomics. A.R. provided  
878 the parental activity reporter cell line. M.V., S.S. and F.P.R. provided a mutagenized VKOR library.  
879 M.A.C. and D.M.F. wrote the manuscript with input from co-authors.

880

### 881 **COMPETING INTERESTS**

882 The authors declare that the variant functional data presented herein are copyrighted, and  
883 may be freely used for non-commercial purposes. Licensing for commercial use may benefit the  
884 authors. The authors declare no additional competing interests.

885 **REFERENCES**

- 886 Bodin L, Perdu J, Diry M, Horellou M-H, Lorient M-A. 2008. Multiple genetic alterations in vitamin  
887 K epoxide reductase complex subunit 1 gene (VKORC1) can explain the high dose  
888 requirement during oral anticoagulation in humans. *J Thromb Haemost* **6**:1436–1439.  
889 doi:10.1111/j.1538-7836.2008.03049.x
- 890 Czogalla KJ, Biswas A, Höning K, Hornung V, Liphardt K, Watzka M, Oldenburg J. 2016.  
891 Warfarin and vitamin K compete for binding to Phe55 in human VKOR. *Nat Struct Mol Biol*.  
892 doi:10.1038/nsmb.3338
- 893 Czogalla KJ, Biswas A, Rost S, Watzka M, Oldenburg J. 2014. The Arg98Trp mutation in  
894 human VKORC1 causing VKCFD2 disrupts a di-Arginine-based ER retention motif. *Blood*.  
895 doi:10.1182/blood-2013-12-545988
- 896 Elazar AA, Weinstein J, Biran I, Fridman Y, Bibi E, Fleishman SJ. 2016. Mutational scanning  
897 reveals the determinants of protein insertion and association energetics in the plasma  
898 membrane. *eLife Sciences* e12125. doi:10.7554/eLife.12125
- 899 Elazar A, Weinstein JJ, Prilusky J, Fleishman SJ. 2016. Interplay between hydrophobicity and  
900 the positive-inside rule in determining membrane-protein topology. *Proc Natl Acad Sci U S*  
901 *A* **113**:10340–10345. doi:10.1073/pnas.1605888113
- 902 Fleming KG, Engelman DM. 2001. Specificity in transmembrane helix-helix interactions can  
903 define a hierarchy of stability for sequence variants. *Proc Natl Acad Sci U S A* **98**:14340–  
904 14344. doi:10.1073/pnas.251367498
- 905 Gasperini M, Starita L, Shendure J. 2016. The power of multiplexed functional analysis of  
906 genetic variants. *Nat Protoc* **11**:1782–1787. doi:10.1038/nprot.2016.135
- 907 Gibson DG, Young L, Chuang R-Y, Venter JC, Hutchison CA 3rd, Smith HO. 2009. Enzymatic  
908 assembly of DNA molecules up to several hundred kilobases. *Nat Methods* **6**:343–345.  
909 doi:10.1038/nmeth.1318

- 910 Gong IY, Schwarz UI, Crown N, Dresser GK, Lazo-Langner A, Zou G, Roden DM, Stein CM,  
911 Rodger M, Wells PS, Kim RB, Tirona RG. 2011. Clinical and genetic determinants of  
912 warfarin pharmacokinetics and pharmacodynamics during treatment initiation. *PLoS One*  
913 **6**:e27808. doi:10.1371/journal.pone.0027808
- 914 Gray VE, Hause RJ, Fowler DM. 2017. Analysis of Large-Scale Mutagenesis Data To Assess  
915 the Impact of Single Amino Acid Substitutions. *Genetics* **207**:53–61.  
916 doi:10.1534/genetics.117.300064
- 917 Guerriero CJ, Reutter K-R, Augustine AA, Preston GM, Weiberth KF, Mackie TD, Cleveland-  
918 Rubeor HC, Bethel NP, Callenberg KM, Nakatsukasa K, Grabe M, Brodsky JL. 2017.  
919 Transmembrane helix hydrophobicity is an energetic barrier during the retrotranslocation of  
920 integral membrane ERAD substrates. *Mol Biol Cell* **28**:2076–2090. doi:10.1091/mbc.E17-  
921 03-0184
- 922 Hallgren KW, Qian W, Yakubenko AV, Runge KW, Berkner KL. 2006. r-VKORC1 Expression in  
923 Factor IX BHK Cells Increases the Extent of Factor IX Carboxylation but Is Limited by  
924 Saturation of Another Carboxylation Component or by a Shift in the Rate-Limiting Step†.  
925 *Biochemistry* **45**:5587–5598. doi:10.1021/bi051986y
- 926 Haque JA, McDonald MG, Kulman JD, Rettie AE. 2014. A cellular system for quantitation of  
927 vitamin K cycle activity: structure-activity effects on vitamin K antagonism by warfarin  
928 metabolites. *Blood* **123**:582–589. doi:10.1182/blood-2013-05-505123
- 929 Harrington DJ, Gorska R, Wheeler R, Davidson S, Murden S, Morse C, Shearer MJ, Mumford  
930 AD. 2008. Pharmacodynamic resistance to warfarin is associated with nucleotide  
931 substitutions in VKORC1. *J Thromb Haemost* **6**:1663–1670. doi:10.1111/j.1538-  
932 7836.2008.03116.x
- 933 Harrington DJ, Siddiq S, Allford SL, Shearer MJ, Mumford AD. 2011. More on: endoplasmic  
934 reticulum loop VKORC1 substitutions cause warfarin resistance but do not diminish  
935 gamma-carboxylation of the vitamin K-dependent coagulation factors. *J Thromb Haemost*

- 936 9:1093–1095. doi:10.1111/j.1538-7836.2011.04249.x
- 937 Hatahet F, Blazyk JL, Martineau E, Mandela E, Zhao Y, Campbell RE, Beckwith J, Boyd D.  
938 2015. Altered Escherichia coli membrane protein assembly machinery allows proper  
939 membrane assembly of eukaryotic protein vitamin K epoxide reductase. *Proc Natl Acad Sci*  
940 *U S A* **112**:15184–15189. doi:10.1073/pnas.1521260112
- 941 Hessa T, Meindl-Beinker NM, Bernsel A, Kim H, Sato Y, Lerch-Bader M, Nilsson I, White SH,  
942 von Heijne G. 2007. Molecular code for transmembrane-helix recognition by the Sec61  
943 translocon. *Nature* **450**:1026–1030. doi:10.1038/nature06387
- 944 Hessa T, Sharma A, Mariappan M, Eshleman HD, Gutierrez E, Hegde RS. 2011. Protein  
945 targeting and degradation are coupled for elimination of mislocalized proteins. *Nature*  
946 **475**:394–397. doi:10.1038/nature10181
- 947 Hopf TA, Colwell LJ, Sheridan R, Rost B, Sander C, Marks DS. 2012. Three-Dimensional  
948 Structures of Membrane Proteins from Genomic Sequencing. *Cell* **149**:1607–1621.  
949 doi:10.1016/j.cell.2012.04.012
- 950 Hopf TA, Green AG, Schubert B, Mersmann S, Schärfe CPI, Ingraham JB, Toth-Petroczy A,  
951 Brock K, Riesselman AJ, Palmedo P, Kang C, Sheridan R, Draizen EJ, Dallago C, Sander  
952 C, Marks DS. 2019. The EVcouplings Python framework for coevolutionary sequence  
953 analysis. *Bioinformatics* **35**:1582–1584. doi:10.1093/bioinformatics/bty862
- 954 Jain PC, Varadarajan R. 2014. A rapid, efficient, and economical inverse polymerase chain  
955 reaction-based method for generating a site saturation mutant library. *Anal Biochem*  
956 **449**:90–98. doi:10.1016/j.ab.2013.12.002
- 957 Kabsch W, Sander C. 1983. Dictionary of protein secondary structure: pattern recognition of  
958 hydrogen-bonded and geometrical features. *Biopolymers* **22**:2577–2637.  
959 doi:10.1002/bip.360221211
- 960 Karczewski KJ, Francioli LC, Tiao G, Cummings BB, Alföldi J, Wang Q, Collins RL, Laricchia  
961 KM, Ganna A, Birnbaum DP, Gauthier LD, Brand H, Solomonson M, Watts NA, Rhodes D,

962 Singer-Berk M, England EM, Seaby EG, Kosmicki JA, Walters RK, Tashman K, Farjoun Y,  
963 Banks E, Poterba T, Wang A, Seed C, Whiffin N, Chong JX, Samocha KE, Pierce-Hoffman  
964 E, Zappala Z, O'Donnell-Luria AH, Minikel EV, Weisburd B, Lek M, Ware JS, Vittal C,  
965 Armean IM, Bergelson L, Cibulskis K, Connolly KM, Covarrubias M, Donnelly S, Ferriera S,  
966 Gabriel S, Gentry J, Gupta N, Jeandet T, Kaplan D, Llanwarne C, Munshi R, Novod S,  
967 Petrillo N, Roazen D, Ruano-Rubio V, Saltzman A, Schleicher M, Soto J, Tibbetts K,  
968 Tolonen C, Wade G, Talkowski ME, The Genome Aggregation Database Consortium,  
969 Neale BM, Daly MJ, MacArthur DG. 2019. Variation across 141,456 human exomes and  
970 genomes reveals the spectrum of loss-of-function intolerance across human protein-coding  
971 genes. *bioRxiv*. doi:10.1101/531210

972 Kurnik D, Qasim H, Sominsky S, Lubetsky A, Markovits N, Li C, Stein CM, Halkin H, Gak E,  
973 Loebstein R. 2012. Effect of the VKORC1 D36Y variant on warfarin dose requirement and  
974 pharmacogenetic dose prediction. *Thromb Haemost* **108**:781–788. doi:10.1160/TH12-03-  
975 0151

976 Landrum MJ, Lee JM, Riley GR, Jang W, Rubinstein WS, Church DM, Maglott DR. 2014.  
977 ClinVar: public archive of relationships among sequence variation and human phenotype.  
978 *Nucleic Acids Res* **42**:D980–5. doi:10.1093/nar/gkt1113

979 Li T, Chang C-Y, Jin D-Y, Lin P-J, Khvorova A, Stafford DW. 2004. Identification of the gene for  
980 vitamin K epoxide reductase. *Nature* **427**:541–544. doi:10.1038/nature02254

981 Liu S, Cheng W, Fowle Grider R, Shen G, Li W. 2014. Structures of an intramembrane vitamin  
982 K epoxide reductase homolog reveal control mechanisms for electron transfer. *Nat*  
983 *Commun* **5**. doi:10.1038/ncomms4110

984 Li W, Schulman S, Dutton RJ, Boyd D, Beckwith J, Rapoport TA. 2010. Structure of a bacterial  
985 homologue of vitamin K epoxide reductase. *Nature* **463**:507–512. doi:10.1038/nature08720

986 Loebstein R, Dvoskin I, Halkin H, Vecsler M, Lubetsky A, Rechavi G, Amariglio N, Cohen Y,  
987 Ken-Dror G, Almog S, Gak E. 2007. A coding VKORC1 Asp36Tyr polymorphism



- 988 predisposes to warfarin resistance. *Blood* **109**:2477–2480. doi:10.1182/blood-2006-08-  
989 038984
- 990 Marks DS, Colwell LJ, Sheridan R, Hopf TA, Pagnani A, Zecchina R, Sander C. 2011. Protein  
991 3D structure computed from evolutionary sequence variation. *PLoS One* **6**:e28766.  
992 doi:10.1371/journal.pone.0028766
- 993 Matreyek KA, Starita LM, Stephany JJ, Martin B, Chiasson MA, Gray VE, Kircher M, Khechaduri  
994 A, Dines JN, Hause RJ, Bhatia S, Evans WE, Relling MV, Yang W, Shendure J, Fowler  
995 DM. 2018. Multiplex assessment of protein variant abundance by massively parallel  
996 sequencing. *Nat Genet* **50**:874–882. doi:10.1038/s41588-018-0122-z
- 997 Matreyek KA, Stephany JJ, Fowler DM. 2017. A platform for functional assessment of large  
998 variant libraries in mammalian cells. *Nucleic Acids Res.* doi:10.1093/nar/gkx183
- 999 Ma W, Goldberg J. 2013. Rules for the recognition of dilysine retrieval motifs by coatomer.  
1000 *EMBO J* **32**:926–937. doi:10.1038/emboj.2013.41
- 1001 Merkle PS, Gotfryd K, Cuendet MA, Leth-Espensen KZ, Gether U, Loland CJ, Rand KD. 2018.  
1002 Substrate-modulated unwinding of transmembrane helices in the NSS transporter LeuT. *Sci*  
1003 *Adv* **4**:eaar6179. doi:10.1126/sciadv.aar6179
- 1004 Mravic M, Thomaston JL, Tucker M, Solomon PE, Liu L, DeGrado WF. 2019. Packing of apolar  
1005 side chains enables accurate design of highly stable membrane proteins. *Science*  
1006 **363**:1418–1423. doi:10.1126/science.aav7541
- 1007 Nilsson I, von Heijne G. 1990. Fine-tuning the topology of a polytopic membrane protein: role of  
1008 positively and negatively charged amino acids. *Cell* **62**:1135–1141. doi:10.1016/0092-  
1009 8674(90)90390-z
- 1010 Oldenburg J, Rost S, Fregin A, Geisen C, Ivaskevicius V, Seifried E, Scharrer I, Heisteringer M,  
1011 Tuddenham E, Muller-Reible C, Zieger B. 2004. Mutations in the VKORC1 Gene Cause  
1012 Warfarin Resistance, Warfarin Sensitivity and Combined Deficiency of Vitamin K  
1013 Dependent Coagulation Factors. *Blood* **104**:277–277.

- 1014 Osinbowale O, Al Malki M, Schade A, Bartholomew JR. 2009. An algorithm for managing  
1015 warfarin resistance. *Cleve Clin J Med* **76**:724–730. doi:10.3949/ccjm.76a.09062
- 1016 Osman A, Enström C, Arbring K, Söderkvist P, Lindahl TL. 2006. Main haplotypes and  
1017 mutational analysis of vitamin K epoxide reductase (VKORC1) in a Swedish population: a  
1018 retrospective analysis of case records. *J Thromb Haemost* **4**:1723–1729.  
1019 doi:10.1111/j.1538-7836.2006.02039.x
- 1020 Owen RP, Gong L, Sagreiya H, Klein TE, Altman RB. 2010. VKORC1 Pharmacogenomics  
1021 Summary. *Pharmacogenet Genomics* **20**:642–644. doi:10.1097/FPC.0b013e32833433b6
- 1022 Peoc'h K, Pruvot S, Gourmel C, dit Sollier CB, Drouet L. 2009. A new VKORC1 mutation  
1023 leading to an isolated resistance to fluindione. *Br J Haematol* **145**:841–843.  
1024 doi:10.1111/j.1365-2141.2009.07687.x
- 1025 Rieder MJ, Reiner AP, Gage BF, Nickerson DA, Eby CS, McLeod HL, Blough DK, Thummel KE,  
1026 Veenstra DL, Rettie AE. 2005. Effect of VKORC1 Haplotypes on Transcriptional Regulation  
1027 and Warfarin Dose. *N Engl J Med* **352**:2285–2293. doi:10.1056/NEJMoa044503
- 1028 Rishavy MA, Usubalieva A, Hallgren KW, Berkner KL. 2011. Novel Insight into the Mechanism  
1029 of the Vitamin K Oxidoreductase (VKOR) ELECTRON RELAY THROUGH Cys43 AND  
1030 Cys51 REDUCES VKOR TO ALLOW VITAMIN K REDUCTION AND FACILITATION OF  
1031 VITAMIN K-DEPENDENT PROTEIN CARBOXYLATION. *J Biol Chem* **286**:7267–7278.  
1032 doi:10.1074/jbc.M110.172213
- 1033 Rost S, Fregin A, Ivaskevicius V, Conzelmann E, Hörtnagel K, Pelz H-J, Lappegard K, Seifried  
1034 E, Scharrer I, Tuddenham EGD, Müller CR, Strom TM, Oldenburg J. 2004. Mutations in  
1035 VKORC1 cause warfarin resistance and multiple coagulation factor deficiency type 2.  
1036 *Nature* **427**:537–541. doi:10.1038/nature02214
- 1037 Rubin AF, Gelman H, Lucas N, Bajjalieh SM, Papenfuss AT, Speed TP, Fowler DM. 2017. A  
1038 statistical framework for analyzing deep mutational scanning data. *Genome Biol* **18**:150.  
1039 doi:10.1186/s13059-017-1272-5

- 1040 Schmeits PCJ, Hermans MHA, van Geest-Daalderop JHH, Poodt J, de Sauvage Nolting PRW,  
1041 Conemans JMH. 2010. VKORC1 mutations in patients with partial resistance to  
1042 phenprocoumon. *Br J Haematol* **148**:955–957. doi:10.1111/j.1365-2141.2009.08017.x
- 1043 Schulman S, Wang B, Li W, Rapoport TA. 2010. Vitamin K epoxide reductase prefers ER  
1044 membrane-anchored thioredoxin-like redox partners. *Proc Natl Acad Sci U S A* **107**:15027–  
1045 15032. doi:10.1073/pnas.1009972107
- 1046 Sharpe HJ, Stevens TJ, Munro S. 2010. A comprehensive comparison of transmembrane  
1047 domains reveals organelle-specific properties. *Cell* **142**:158–169.  
1048 doi:10.1016/j.cell.2010.05.037
- 1049 Shen G, Cui W, Zhang H, Zhou F, Huang W, Liu Q, Yang Y, Li S, Bowman GR, Sadler JE,  
1050 Gross ML, Li W. 2017. Warfarin traps human vitamin K epoxide reductase in an  
1051 intermediate state during electron transfer. *Nat Struct Mol Biol* **24**:69.  
1052 doi:10.1038/nsmb.3333
- 1053 Tie J-K, Jin D-Y, Stafford DW. 2012. Human Vitamin K Epoxide Reductase and Its Bacterial  
1054 Homologue Have Different Membrane Topologies and Reaction Mechanisms. *J Biol Chem*  
1055 **287**:33945–33955. doi:10.1074/jbc.M112.402941
- 1056 Tie J-K, Jin D-Y, Tie K, Stafford DW. 2013. Evaluation of warfarin resistance using transcription  
1057 activator-like effector nucleases-mediated vitamin K epoxide reductase knockout HEK293  
1058 cells. *J Thromb Haemost* **11**:1556–1564. doi:10.1111/jth.12306
- 1059 Toth-Petroczy A, Palmedo P, Ingraham J, Hopf TA, Berger B, Sander C, Marks DS. 2016.  
1060 Structured States of Disordered Proteins from Genomic Sequences. *Cell* **167**:158–170.e12.  
1061 doi:10.1016/j.cell.2016.09.010
- 1062 Touw WG, Baakman C, Black J, te Beek TAH, Krieger E, Joosten RP, Vriend G. 2015. A series  
1063 of PDB-related databanks for everyday needs. *Nucleic Acids Res* **43**:D364–8.  
1064 doi:10.1093/nar/gku1028
- 1065 Ulmschneider MB, Sansom MS. 2001. Amino acid distributions in integral membrane protein

- 1066 structures. *Biochim Biophys Acta* **1512**:1–14. doi:10.1016/s0005-2736(01)00299-1
- 1067 von Heijne G. 1989. Control of topology and mode of assembly of a polytopic membrane protein
- 1068 by positively charged residues. *Nature* **341**:456–458. doi:10.1038/341456a0
- 1069 Watzka M, Geisen C, Bevans CG, Sittinger K, Spohn G, Rost S, Seifried E, Müller CR,
- 1070 Oldenburg J. 2011. Thirteen novel VKORC1 mutations associated with oral anticoagulant
- 1071 resistance: insights into improved patient diagnosis and treatment. *J Thromb Haemost*
- 1072 **9**:109–118. doi:10.1111/j.1538-7836.2010.04095.x
- 1073 Wilms EB, Touw DJ, Conemans JMH, Veldkamp R, Hermans M. 2008. A new VKORC1 allelic
- 1074 variant (p.Trp59Arg) in a patient with partial resistance to acenocoumarol and
- 1075 phenprocoumon. *J Thromb Haemost* **6**:1224–1226. doi:10.1111/j.1538-7836.2008.02975.x
- 1076 Wu S, Chen X, Jin D-Y, Stafford DW, Pedersen LG, Tie J-K. 2018. Warfarin and vitamin K
- 1077 epoxide reductase: a molecular accounting for observed inhibition. *Blood*.
- 1078 doi:10.1182/blood-2018-01-830901
- 1079 Yang J, Yan R, Roy A, Xu D, Poisson J, Zhang Y. 2015. The I-TASSER Suite: protein structure
- 1080 and function prediction. *Nat Methods* **12**:7–8. doi:10.1038/nmeth.3213
- 1081 Yuan H-Y, Chen J-J, Lee MTM, Wung J-C, Chen Y-F, Charng M-J, Lu M-J, Hung C-R, Wei C-Y,
- 1082 Chen C-H, Wu J-Y, Chen Y-T. 2005. A novel functional VKORC1 promoter polymorphism is
- 1083 associated with inter-individual and inter-ethnic differences in warfarin sensitivity. *Hum Mol*
- 1084 *Genet* **14**:1745–1751. doi:10.1093/hmg/ddi180
- 1085 Zimmermann A, Matschiner JT. 1974. Biochemical basis of hereditary resistance to warfarin in
- 1086 the rat. *Biochem Pharmacol* **23**:1033–1040. doi:10.1016/0006-2952(74)90002-1
